# Supplementary material
Source: publisher figshare collection journal article supplement (https://geolsoc.figshare.com/ndownloader/files/14074853)
Supplement: Supplementary file 1 [file 14074853]

## Sheet: PlotDat3
Source sheet	Sheet1	6.39795	0.638	0.832334	0.9	3.81698	0.0935972	6.60836	0.638	8.20153	0.553	21.1957	0.2247	4.58402	0.6881	5.14849	0.703	5.60708	0.675	2.39246	0.200501
Plot name	Concordia2	7.91766	0.553	0.842537	0.872034	2.74902	0.122987	6.60432	0.641581	8.19608	0.557298	21.1829	0.2263	4.58142	0.690058	5.14544	0.705865	5.60254	0.67882	1.75297	0.32901
Plot Type	1	20.5255	0.2247	0.872042	0.801678	2.1108	0.164261	6.59235	0.645025	8.17993	0.56143	21.1447	0.227838	4.5737	0.691941	5.13643	0.70862	5.58908	0.682494	1.36204	0.61652
1st free col	21	4.4484	0.6881	0.903087	0.737331	1.68745	0.222656	6.5729	0.648199	8.15369	0.565239	21.0828	0.229256	4.56116	0.693676	5.12178	0.711159	5.56722	0.685879
Sigma Level	2	4.99002	0.703	0.935789	0.678466	1.38686	0.305829	6.54674	0.650981	8.11839	0.568577	20.9994	0.230498	4.5443	0.695196	5.10207	0.713385	5.53781	0.688847
Absolute Errs	TRUE	5.37057	0.675	0.970279	0.624601	1.16298	0.425008	6.51485	0.653264	8.07537	0.571317	20.8978	0.231518	4.52375	0.696444	5.07806	0.715211	5.50197	0.691282
Symbol Type	1	IsoLine	IsoLine	1.0067	0.575299	0.990241	0.596707	6.47847	0.654961	8.02629	0.573353	20.782	0.232276	4.5003	0.697372	5.05066	0.716569	5.46108	0.693091
Inverse Plot	TRUE			1.04522	0.530163	0.853279	0.845272	6.439	0.656005	7.97304	0.574606	20.6562	0.232742	4.47486	0.697943	5.02094	0.717404	5.41671	0.694206
Color Plot	TRUE			1.086	0.488828	IsoLine	IsoLine	6.39795	0.656358	7.91766	0.57503	20.5255	0.2329	4.4484	0.698136	4.99002	0.717686	5.37057	0.694582
3D plot	FALSE			1.12926	0.450965			6.3569	0.656005	7.86227	0.574606	20.3947	0.232742	4.42194	0.697943	4.9591	0.717404	5.32443	0.694206
Linear	FALSE			1.17521	0.416272			6.31743	0.654961	7.80902	0.573353	20.2689	0.232276	4.3965	0.697372	4.92938	0.716569	5.28006	0.693091
Data Range	Z3:AC8			1.2241	0.384474			6.28105	0.653264	7.75994	0.571317	20.1531	0.231518	4.37305	0.696444	4.90198	0.715211	5.23917	0.691282
Filled Symbols	TRUE			1.27623	0.355321			6.24917	0.650981	7.71692	0.568577	20.0515	0.230498	4.3525	0.695196	4.87797	0.713385	5.20333	0.688847
ConcAge	FALSE			1.3319	0.328585			6.223	0.648199	7.68162	0.565239	19.9681	0.229256	4.33563	0.693676	4.85826	0.711159	5.17392	0.685879
ConcSwap	FALSE			1.39148	0.304057			6.20356	0.645025	7.65539	0.56143	19.9062	0.227838	4.3231	0.691941	4.84361	0.70862	5.15206	0.682494
1st Symbol-row	1			1.4554	0.281549			6.19158	0.641581	7.63923	0.557298	19.868	0.2263	4.31538	0.690058	4.8346	0.705865	5.1386	0.67882
				1.52411	0.260886			6.18754	0.638	7.63378	0.553	19.8552	0.2247	4.31278	0.6881	4.83155	0.703	5.13406	0.675
				1.59819	0.241912			6.19158	0.634419	7.63923	0.548702	19.868	0.2231	4.31538	0.686142	4.8346	0.700135	5.1386	0.67118
				1.67826	0.224481			6.20356	0.630975	7.65539	0.54457	19.9062	0.221562	4.3231	0.684259	4.84361	0.69738	5.15206	0.667506
				1.76507	0.208464			6.223	0.627801	7.68162	0.540761	19.9681	0.220144	4.33563	0.682524	4.85826	0.694841	5.17392	0.664121
				1.85948	0.193739			6.24917	0.625019	7.71692	0.537423	20.0515	0.218902	4.3525	0.681004	4.87797	0.692615	5.20333	0.661153
				1.96253	0.180197			6.28105	0.622736	7.75994	0.534683	20.1531	0.217882	4.37305	0.679756	4.90198	0.690789	5.23917	0.658718
				2.07544	0.167739			6.31743	0.621039	7.80902	0.532647	20.2689	0.217124	4.3965	0.678828	4.92938	0.689431	5.28006	0.656909
				2.19966	0.156274			6.3569	0.619995	7.86227	0.531394	20.3947	0.216658	4.42194	0.678257	4.9591	0.688596	5.32443	0.655794
				2.33697	0.145717			6.39795	0.619642	7.91766	0.53097	20.5255	0.2165	4.4484	0.678064	4.99002	0.688314	5.37057	0.655418
				2.48952	0.135993			6.439	0.619995	7.97304	0.531394	20.6562	0.216658	4.47486	0.678257	5.02094	0.688596	5.41671	0.655794
				2.65997	0.127033			6.47847	0.621039	8.02629	0.532647	20.782	0.217124	4.5003	0.678828	5.05066	0.689431	5.46108	0.656909
				2.85162	0.118772			6.51485	0.622736	8.07537	0.534683	20.8978	0.217882	4.52375	0.679756	5.07806	0.690789	5.50197	0.658718
				3.06865	0.111153			6.54674	0.625019	8.11839	0.537423	20.9994	0.218902	4.5443	0.681004	5.10207	0.692615	5.53781	0.661153
				3.31643	0.104123			6.5729	0.627801	8.15369	0.540761	21.0828	0.220144	4.56116	0.682524	5.12178	0.694841	5.56722	0.664121
				3.49783	0.1			6.59235	0.630975	8.17993	0.54457	21.1447	0.221562	4.5737	0.684259	5.13643	0.69738	5.58908	0.667506
				IsoLine	IsoLine			6.60432	0.634419	8.19608	0.548702	21.1829	0.2231	4.58142	0.686142	5.14544	0.700135	5.60254	0.67118
								6.60836	0.638	8.20153	0.553	21.1957	0.2247	4.58402	0.6881	5.14849	0.703	5.60708	0.675
								ErrEll	ErrEll	ErrEll	ErrEll	ErrEll	ErrEll	ErrEll	ErrEll	ErrEll	ErrEll	ErrEll	ErrEll

## Sheet: Sheet1
analysis#	Mn_ppm	Sr_ppm	Y_ppm	Th_ppm	U_ppm	La_ppm	Ce_ppm	Pr_ppm	Nd_ppm	Sm_ppm	Eu_ppm	Gd_ppm	Tb_ppm	Dy_ppm	Ho_ppm	Er_ppm	Tm_ppm	Yb_ppm	Lu_ppm	238U/206Pb	±2s	207Pb/206Pb	±2s	207Pb Corrected Age	±2s
7228_7-1A 2062.1, Snadd Formation, Nordkapp Basin
Spot 1	618.6	826.4	317.1	46.4	12.73	1011	2396	301.4	1264	190.5	27.64	130.8	13.04	66.8	11.38	27.88	3.399	18.13	2.555	6.39795	0.171922	0.638	0.015	264.893	20.9556
Spot 2	506.2	485.6	213.9	20.07	9.62	528.3	1084	117.2	454.7	68.1	11.82	60.62	6.34	37.23	7.49	21.36	3.001	18.78	3.284	7.91766	0.23195	0.553	0.018	299.585	20.2579
Spot 3	33.3	992	227.5	42.82	66.18	165.8	322.1	48.88	227.4	44.26	7.41	41.22	5.093	33.21	6.6	17.41	2.401	13.09	1.843	20.5255	0.547682	0.2247	0.0067	241.35	6.89002
Spot 4	492.2	786.3	751	4.976	42.49	74.13	293.4	49.65	318.5	134.6	31.96	175.5	25.12	161	29.99	74.82	8.98	45.62	5.69	4.4484	0.110814	0.6881	0.0082	294.695	19.853
Spot 5	116.1	4149	148.6	39.92	24.91	115.1	423.7	65.19	364.1	75.4	15.4	63.83	6.027	31.6	5.48	13.74	1.607	8.61	1.44	4.99002	0.129482	0.703	0.012	234.724	22.5327
Spot 6	408	4201	403.5	59.49	16.38	614.5	2144	340	1741	298.5	65.36	199.6	18.81	92.6	14.57	32.96	3.638	18.2	2.384	5.37057	0.193248	0.675	0.016	261.042	26.7513
Spot 7	400	230.6	25.56	0.1073	0.0001	0.254	1.182	0.233	1.95	1.19	0.646	2.13	0.371	3.18	0.845	3.3	0.597	4.48	0.992
Spot 8	275.1	823.2	149.6	20.26	6.173	735	1510	166.3	682	95.5	14.31	70.4	6.551	34.05	5.97	14.17	1.62	8.54	1.23	4.96771	0.140665	0.69	0.019	258.203	32.4326
Spot 9	666.6	663.7	519.9	2.366	3.476	136.9	499.5	85.5	554.7	216.6	28.08	224.9	25.12	131.9	20.59	42.52	4.457	20.6	2.349	1.82448	0.0499312	0.792	0.017	263.559	80.1856
Spot 10	459.9	219.1	122.3	2.722	7.769	203.8	341.6	31.83	130	20.96	3.286	21.37	2.538	17.93	4.248	12.91	1.726	10.21	1.87	5.27704	0.150375	0.628	0.015	340.38	25.4089
Spot 11	410	536.7	80.9	0.089	0.04	0.279	0.782	0.137	0.94	0.597	0.201	1.64	0.429	5.91	2.389	12.86	2.697	19.73	2.699
Spot 13	650.9	377.6	748	17.27	34.33	8.98	30.17	5.39	41.16	22.5	8.25	52.59	10.81	102.5	27.53	97.1	16.22	113.1	18.34	16.415	0.458067	0.1348	0.0048	343.666	9.70257
Spot 14	155.7	27450	379.4	16.82	1.901	2656	4132	406.4	1501	214	54.67	164.9	17.18	88.6	14.37	30.03	2.838	11.28	1.003	3.79363	0.13672	0.68	0.026	369.309	55.5523
Spot 15	180.9	1955	51.96	9.22	5.8	165.7	442	52.7	231.1	29.75	7.21	19.83	1.67	8.35	1.568	4.12	0.532	3.54	0.627	1.62338	0.0553424	0.8	0.012	254.743	69.6409
Spot 16	370.3	648.6	181.8	139.6	215.8	904	1874	200.3	749	93.2	24.01	66	6.05	33.04	6.2	17.12	2.305	15.11	2.664	18.7477	0.492065	0.1966	0.0037	275.785	7.33033
Spot 17	93.4	498.3	39.56	1.731	14.43	10.6	34.04	5.49	30.47	9.74	4.268	10.84	1.403	7.98	1.426	3.42	0.388	2.053	0.225	10.2881	0.306949	0.1787	0.0086	512.316	16.2012
Spot 18	312.4	385.7	468.6	22.84	20.5	229.2	754	130.2	674.7	153	26.1	145.3	17.12	97.8	18.01	44.59	5.085	28.47	3.931	16.0026	0.435339	0.2561	0.0091	293.737	9.08167
Spot 19	441.1	147.8	597.9	5.73	31.55	44.96	140	21.61	120.8	42.15	8.86	55.15	9.87	78.1	19.92	65.3	9.95	65.2	9.89	21.6076	0.606955	0.1959	0.0087	239.808	7.38228
Spot 20	334.5	4618	98.7	19.19	8.23	250.1	737	112.6	524.4	78.1	16.46	50.75	4.205	18.67	3.224	7.62	0.908	5.77	0.968	2.75634	0.0729351	0.78	0.014	197.789	45.9943
Spot 21	432	2975	697	135.5	112.8	394.9	1443	269.5	1446	293.1	77.8	210.5	22.49	120.3	22.05	59.7	8.07	50.63	8.38	20.9118	0.568492	0.2712	0.006	219.406	6.37426
Spot 22	349.9	499.9	544.2	34.16	9.43	412.3	1027	152.5	740	161.7	30.71	155.2	18.82	110.3	20.52	51.37	6.08	31.87	4.493	8.41751	0.269247	0.542	0.017	291.85	18.7569
Spot 23	472.6	3479	351.3	141.8	20.56	1105	3308	445.2	2094	305.5	54.73	184.5	16.41	78.5	12.33	29.01	3.471	17.38	2.515	7.4184	0.198117	0.577	0.011	294.202	15.014
Spot 24	403	442.9	478.1	43.86	12.95	495.3	1350	196.5	893	176.8	21.93	146.6	16.66	96.4	17.74	44.89	5.422	27.72	3.905	9.04977	0.294834	0.507	0.014	302.009	15.9307
Spot 26	380.7	511.1	613.5	29.28	9.39	442.5	1163	170.4	840	183.7	33.67	177.6	20.8	126.2	23.36	57.47	6.89	34.73	5.169	7.34754	0.205148	0.535	0.015	343.238	19.0381
Spot 27	192.3	5580	346.4	105.1	24.39	294.6	1282	225.8	1191	230.7	42.38	169.1	16.78	85	13.64	29.84	3.152	14.29	1.908	4.98008	0.136407	0.675	0.011	283.055	21.4005
Spot 28	102.5	5003	158.2	11.08	4.869	192.4	557.2	76.5	393.6	82.6	17.92	66.1	6.87	37.06	6.3	14.52	1.657	8.18	1.197	2.95683	0.0821827	0.749	0.019	279.554	54.0395
Spot 29	124.5	4507	160	66.61	15.02	646.7	1520	175.9	743.2	106.2	18.64	77	6.52	32	5.517	13.49	1.58	8.05	1.33	1.55063	0.0384712	0.806	0.011	227.686	68.9812
Spot 30	341.8	1291	325.2	194.5	54.21	1481	3733	414.9	1691	213.7	31.63	139.4	12.25	63.5	11.26	28.52	3.478	18.92	3.284	13.4409	0.361313	0.3767	0.0091	279.277	9.29346
Spot 31	186	2643	59.04	0.0407	0.025	0.717	3.13	0.545	3.26	1.57	0.485	3.43	0.788	7.56	2.006	5.55	0.537	1.93	0.225
Spot 32	177.8	1081	57.5	17.18	8.97	90.6	266.5	30.97	140.9	23.5	4.742	21.24	2.069	11.72	2.224	5.65	0.65	3.54	0.657	6.68003	0.187416	0.615	0.017	281.544	22.3205
Spot 33	494.1	321.1	119.3	2.204	4.24	110.4	216.3	24.78	118.5	28.29	6.98	31.36	3.68	23.77	4.5	12.14	1.504	8.27	1.506	4.44444	0.237037	0.66	0.022	348.622	43.5374
Spot 34	347.1	241.4	673	19.94	14.88	143.6	590	99.9	578.3	157.7	13.18	172.9	22.37	142.1	27.19	68.3	8.04	39.43	5.879	11.8483	0.350958	0.384	0.013	312.081	12.6369
Spot 35	528.3	1280	412.9	14.42	3.778	574	1490	201.7	909	162.9	31.4	139.9	15.23	87.3	15.63	38.32	4.322	21.27	3.326	4.47628	0.138256	0.682	0.019	304.321	35.9603
Spot 36	725	346.6	1332	0.529	3.689	11.16	52.79	12.52	123.4	86.7	25.05	187.6	32.36	253.5	56.47	156.5	19.89	103.7	15.83	8.22368	0.30433	0.507	0.027	332.994	28.3406
Spot 37	385.3	3396	139.6	15.7	9.26	244.3	847	133.7	652.5	103.1	19.13	69.6	5.92	29.46	4.808	11.16	1.265	6.21	1.029	3.77786	0.109896	0.738	0.016	237.004	37.0161
Spot 38	215.3	1909	74.2	39.78	20	390.7	885	104.4	428.3	53.97	11.29	36.33	2.825	13.36	2.369	5.83	0.712	4.21	0.855	8.51789	0.224919	0.553	0.013	277.915	14.7014
Spot 39	207.1	2106	205.1	66.3	32.71	1853	2859	280.1	1062	149.9	20	110.8	9.38	46.21	7.68	17.62	1.966	10.48	1.759	8.3612	0.223711	0.556	0.011	280.367	13.5475
Spot 40	534.5	242.5	108	1.54	5.788	145.9	372	43.34	178.5	29.33	6.25	26.29	2.941	18.02	3.697	10.28	1.335	8.44	1.598	5.92066	0.175271	0.589	0.018	355.401	26.4981
Spot 41	178.4	2080	213.3	19.46	4.94	415.5	1285	201.6	936	147.6	24.52	99.6	10.35	50.6	8.45	19.74	2.3	11.93	1.702	2.22222	0.133333	0.798	0.023	176.307	87.1596
Spot 42	409.9	2356	64.9	16.85	5.353	604.2	1021	109.9	416.3	49.37	10.13	35.46	3.068	13.72	2.446	5.96	0.672	3.89	0.737	2.19394	0.0625741	0.777	0.018	275.572	69.7059
Spot 43	227.4	2358	69.7	4.591	4.378	50.72	234	41.69	225	39.07	9.5	28.98	2.785	12.68	2.222	5.69	0.655	3.6	0.668	2.68168	0.0791057	0.78	0.021	204.437	65.8933
Spot 44	456.9	4055	124.3	40.81	11.47	602.2	1459	186.8	756	97.8	22.63	63.33	5.9	26.1	4.231	9.64	1.031	5.96	0.926	4.85909	0.136942	0.692	0.018	260.936	31.6624
Spot 45	233.4	2216	46.1	37.36	9.24	752	1033	96.6	349.9	39.8	5.34	28.81	2.335	10.33	1.652	3.82	0.385	2.11	0.369	3.57143	0.153061	0.777	0.024	153.674	56.3951
Spot 46	474.1	681.3	148.9	23.18	30.92	160.4	409	49.22	210.8	35.24	11.16	29	3.406	19.82	4.092	12.76	2.012	13.74	2.722	8.76424	0.230436	0.535	0.011	286.45	13.0488
Spot 47	841.2	513.7	387	23.77	44.65	156.8	587.6	93.7	483.1	107.6	23.68	95.6	11.67	65.54	13.02	36.56	5.123	31.83	5.415	13.8715	0.346356	0.2791	0.006	325.689	8.76977
Spot 48	316	8680	453.3	118	57.58	334.1	1103	153.2	792	187.3	41.34	152.7	18.46	92.4	16.53	42.21	5.368	28.95	3.936	7.29395	0.191526	0.5915	0.008	283.231	12.7775
Spot 49	425.5	822	330	21.4	9.81	190.8	618	85.6	415	88	24.7	84.4	10.24	57	10.77	28	3.51	20.29	3.38	4.7081	0.135214	0.728	0.015	204.144	28.3842
Spot 50	399.3	677.7	155.1	28.03	23.4	294.1	1382	118.5	534	95.2	20.42	71.4	7.19	33.26	5.79	14.18	1.646	9.05	1.423	7.28863	0.419681	0.565	0.016	312.959	25.1895
Spot 51	194.7	1462	70.2	20.56	6.05	503.3	1846	108.6	405.2	48.1	9.57	35.23	3.121	13.8	2.379	5.75	0.654	3.95	0.796	4.66418	0.141405	0.724	0.02	213.699	36.3122
Spot 52	291.7	815.8	141	4.334	5.621	116.8	378.1	57.09	297.2	75.3	15.02	64.8	6.77	30.39	4.99	11.02	1.211	6.27	0.794	2.70563	0.0732042	0.765	0.017	254.967	54.0304
Spot 53	499.5	1298	149.1	142.8	87	2527	5070	291	1012	112.2	23.97	72	6.57	28.23	4.99	11.99	1.508	9.33	1.667	16.1082	0.441109	0.3391	0.0074	251.4	7.82522
Spot 54	234.7	211.4	48.13	0.937	0.108	3.86	15.5	3.19	21.32	7.48	1.312	10.7	1.478	9	1.852	4.93	0.572	3.36	0.565
Spot 55	747.5	582.1	302.4	51.5	34.28	190.1	742	105	516.5	111.7	28.8	86.7	9.65	47.58	8.61	22.82	3.022	19.3	3.345	12.5392	0.314462	0.493	0.011	225.775	9.33545
Spot 56	224.7	6277	471	68.6	18.61	1697	4234	479	1966	327.6	70	219.8	23.9	107.1	17.43	40.57	4.9	26.63	3.349	2.77778	0.0771605	0.759	0.012	267.338	40.3052
Spot 57	686.8	285.7	59.8	0.062	1.373	1.241	5.02	0.989	7.37	3.57	0.95	8.62	1.495	10.17	2.447	7.43	0.937	5.92	0.945	3.44947	0.118988	0.712	0.038	329.613	86.8121
Spot 58	368.2	1149	243.4	56.1	13.43	642	1672	224.2	908	138.1	27.03	96.1	9.9	47	8.29	20.99	2.583	16.34	2.373	5.99161	0.165137	0.649	0.016	268.593	23.4907
Spot 59	350.7	416.4	212	43.62	49.6	286	473	50.1	224.6	53.7	14.23	62.2	8.91	47.9	8.74	21.2	2.469	14.45	2.115	14.3143	0.389311	0.2739	0.0096	318.49	10.0499
Spot 60	721.4	262.6	1179	62.14	90.4	770	2302	355.3	1651	313	41.13	262.5	34.99	203.5	39.26	116.4	18.57	144.4	19.99	14.9187	0.378365	0.2292	0.0056	328.936	8.75531
Spot 61	384.9	671.1	312.7	1.254	7.44	159	279	28.6	115	21.57	4.38	26.08	4.057	34.13	10.06	36.42	5.052	25.35	2.976
Spot 62	513.8	859	278.6	32.54	9.01	346.4	937	140.2	618.7	105.7	23.79	74.8	7.78	41.13	7.91	22.53	3.247	20.77	3.424	3.24254	0.0893697	0.741	0.015	273.542	40.6617
Spot 63	477	603	754	8.47	43.4	105.7	390.1	66	371.1	99.3	14.16	106.9	15.65	101.8	22.24	70	11.03	75.8	14.51	11.1111	0.382716	0.486	0.011	260.238	12.1707
Spot 64	388.9	3569	304	99.2	17.27	916	1992	240.3	987	163	34.3	137.8	16.2	83.2	13.3	28	2.77	12.65	1.711	5.07357	0.139002	0.695	0.014	244.009	24.8678
Spot 65	492.8	257.9	415.8	24.69	60.12	228.8	602.6	75.5	344.7	69.8	16.39	75.9	10.08	64.1	13.78	40.95	5.91	36.41	6.71	15.2138	0.416625	0.3617	0.0066	254.46	7.84974
Spot 66	90.1	7395	209.8	79.8	10.51	982	2777	422.1	1914	308.3	68.1	175.8	14.7	57.4	7.73	15.69	1.569	7.38	0.964	3.04785	0.102183	0.747	0.014	275.847	41.3349
Spot 67	217.7	932.4	79.2	78.9	24.97	442.8	953	110.3	406.4	46.63	11.12	31.72	2.936	14.51	2.572	6.82	0.862	4.95	0.956	7.77605	0.211634	0.589	0.013	267.682	15.91
Spot 68	375.6	287.2	881	0.144	15.3	18.05	119.5	29.4	211.8	105.3	4.59	156.7	29.49	200.2	37.3	96.4	12.49	66.65	9.15	5.44662	0.296657	0.505	0.019	511.334	38.1691
Spot 69	839.6	827.9	1712	13.24	62.53	114.9	466.9	92.7	589.6	260.7	33.36	336.5	57.84	371.7	68	179.2	22.23	115	15.54	15.1561	0.390503	0.376	0.0076	247.971	7.63387
Spot 70	200.5	1529	68.8	13.53	4.093	265.2	516.4	56.73	254.7	39.07	6.96	30.63	2.91	14.7	2.667	6.98	0.826	4.42	0.869	3.78931	0.106256	0.733	0.024	247.904	52.0561
Spot 72	361.2	510	726	55.9	13.78	593.8	1424	213.2	1021	217.3	46.33	209.3	26.56	149.2	27.49	68.9	8.25	41.76	6.177	8.88889	0.244938	0.495	0.017	318.349	17.5534
Spot 73	99.9	2012	401	0.566	1.494	86.5	225.7	33.56	184.2	66.8	16.42	100.9	13.62	72.6	14.42	44.76	7.02	41.41	5.75
Spot 74	518.7	635.1	381.3	3.566	5.69	125.6	392.8	66.02	378.4	128.1	17.85	135.7	16.23	81.3	13.73	31.24	3.485	16.08	2.086	2.74348	0.0827938	0.772	0.018	226.654	56.2434
Spot 75	179.3	17000	394.9	15.32	2.946	1607	2341	259.2	953	158.7	47.59	139	16.62	83.6	13.96	30.74	3.144	13.46	1.565	11.7233	0.508515	0.288	0.031	379.171	25.8672
Spot 76	262.9	5173	609.7	66.36	26.95	794	2369	364.9	1634	310	70.69	229.6	26.06	129	22.36	55.03	6.67	34.5	4.743	5.01253	0.12814	0.6704	0.0096	288.832	19.3957
Spot 77	515.3	137.8	251	0.69	7.609	8.58	33.47	6.55	40.87	17.81	4.43	28.56	4.791	31.5	7.51	23.42	3.267	20.57	4.445	15.3374	0.564568	0.318	0.023	274.843	15.398
Spot 78	276.4	2837	460.9	254.2	149.5	90.9	328.2	60.69	367.1	122.3	33.43	122.3	15.78	87.9	16.43	44.17	5.73	31.26	4.409	16.8039	0.451794	0.2338	0.0076	290.169	8.49652
Spot 79	273.8	1960	138.7	68.76	53.23	442.7	1144	161	665.5	85.1	24.72	56.53	5.193	23.83	4.574	12.03	1.515	9.33	1.726	11.7509	0.303783	0.439	0.0088	277.743	9.55514
Spot 80	213.3	1356	89.1	36.75	12.51	261.6	436.1	46.56	195.9	36.24	8.99	34.53	4.049	20.94	3.673	8.75	0.972	5.04	0.832	6.92042	0.210725	0.598	0.014	291.456	19.0731
Spot 81	532.4	585.9	264.8	41.82	18.48	418.4	1129	156.2	675.6	102.4	19.35	77.9	8.01	42.48	8.15	21.58	2.764	16.6	2.933	8.95255	0.240445	0.582	0.014	237.829	14.609
Spot 82	299.4	2717	323.8	18.52	2.736	1962	4289	513.4	2204	303.4	40.38	178.4	16.12	78.5	12.56	29.15	3.205	16.66	2.1	1.67308	0.0475863	0.802	0.02	230.875	100.91
Spot 83	183	398	17.35	0.013	0.603	0.121	0.379	0.065	0.5	0.233	0.097	0.476	0.106	1.34	0.555	2.97	0.544	3.71	0.523
Spot 84	178.1	1005	161	0.13	0.143	3.31	14.74	3.145	24.36	13.56	3.419	24.78	3.287	20.78	4.97	15.76	2.01	12.71	2.615
Spot 85	692	204.9	420.7	32.84	48.16	53.48	192.2	30.33	174.2	47.58	9.74	58	8.69	62.99	13.98	43.94	7.05	49.84	8.59	18.3993	0.507799	0.163	0.0066	295.166	8.50863
Spot 86	286.9	1067	147.8	13.21	23.57	152.4	432	59.39	312.3	68.4	11.96	60.94	6.35	33.63	5.84	13.78	1.585	8.57	1.193	11.5473	0.306685	0.426	0.011	291.594	10.9415
Spot 87	217.8	993	57.72	4.907	2.285	65.4	148.4	17.68	82	15.94	3.862	15.1	1.708	10.07	2.001	5.44	0.673	4.32	0.775	2.56476	0.0855139	0.78	0.027	215.798	86.2158
Spot 88	184.1	1897	141.2	16.4	3.095	634.6	1341	183.7	834.5	124.8	24.71	78.8	7.06	34.09	5.362	12.2	1.271	6.7	0.891	1.81818	0.0528926	0.785	0.02	305.547	91.5519
Spot 89	580.7	407.6	277.1	4.88	2.127	549.3	968	116.2	502.1	92.4	14.07	88	9.92	57.93	10.9	27.42	3.316	18.39	2.622	3.0175	0.109264	0.742	0.03	294.217	79.853
Spot 90	266.6	2678	583.3	106.7	49.16	1099	2831	386.6	1720	305.3	57.71	216.7	22.88	123.5	21.08	53.46	6.75	38.21	4.814	7.20981	0.192331	0.5837	0.0095	295.467	14.1768
Spot 91	341.3	644.5	207.3	42.43	26.07	538.4	1122	135.4	530.2	74.7	13.18	56.09	6.37	37.58	7.31	20.14	2.68	16.75	2.503	6.80735	0.18536	0.517	0.011	392.418	17.0621
Spot 92	150.9	3891	70.1	65.08	19.9	697	1069	110.4	418.9	53.06	10.39	36.62	3.235	15.67	2.645	6.09	0.68	3.89	0.572	7.39645	0.207888	0.573	0.014	299.491	17.7828
Spot 93	510.2	444.2	310.7	15.73	197.7	233.4	705	102.8	487.3	94.8	17.2	83.8	9.89	59.64	11.52	31.12	3.908	24.14	3.565	18.5117	0.479754	0.245	0.0046	258.834	6.95289
Spot 94	326.8	2545	170.7	30.06	15.62	175.3	609.2	90.6	453.2	80.9	12.78	59.12	5.74	30.67	5.47	14.37	1.805	11.12	1.76	6.77048	0.187942	0.661	0.017	221.411	21.9214
Spot 95	501	752	690.8	150.2	95.39	278.1	874	148.4	778	162.1	36.81	147.2	17.35	106.5	21.43	63.23	9.18	63.22	10.8	14.2572	0.365882	0.3263	0.0059	291.062	8.18404
Spot 96	316.8	737.5	313.9	268.9	84	379.4	969	142.5	675	126.1	22.49	98.2	10.63	58.06	10.82	28.51	3.588	21.98	3.517	13.3049	0.336341	0.361	0.0064	291.421	8.38121
Spot 97	694.6	1052	141	15.47	33.3	330.3	746	93.2	374.6	51.6	10.48	40.16	4.037	22.09	4.5	12.96	1.74	11.46	2.06	12.4688	0.342038	0.459	0.013	248.862	10.9046
Spot 98	224.5	1702	129.1	14.44	8.81	169	559.4	82.5	406.8	71.5	15.79	48.17	4.307	21.69	3.976	10.93	1.411	9.84	1.657	3.52734	0.09456	0.714	0.016	316.447	39.0808
Spot 99	292.9	153.5	98.8	3	7.88	105.5	155.1	13.09	52	10.08	2.46	11.37	1.63	12.15	2.85	8.87	1.26	9.11	1.35	5.20833	0.352648	0.623	0.023	353.077	42.1169
Spot 100	307.3	346.1	44.3	48	5.37	355	654	75.3	296	38.5	4.36	21.64	1.961	9.83	1.698	4.7	0.574	3.85	0.729	6.66667	0.404444	0.552	0.031	358.937	41.9362
7324/10-1 2653.7, Havert Formation, Bjarmeland Platform
Spot 110	1021.7	1139	320	28.05	11.05	1599	3327	401.3	1691	242	33.27	147.8	15.18	72.3	11.91	28.01	3.171	16.45	2.259	5.63698	0.200186	0.618	0.028	332.05	40.7144
Spot 111	251.1	70.8	123.6	7.41	0.987	4.67	13.45	2.16	15.6	6.56	1.76	9.74	1.87	17.86	4.39	15.71	2.33	14.81	2.24
Spot 115	127.3	516	58.2	3.09	0.56	11.32	45.5	8.03	56.9	20.8	5.88	22.4	2.59	13.5	2.09	4.27	0.361	1.49	0.173
Spot 116	457.7	546.7	439	41.39	23.5	205.1	781	130	748	162.3	28.97	127.9	15.35	84.8	16.04	43.02	5.78	33.37	5.19	6.31313	0.271018	0.395	0.021	574.542	34.5694
Spot 119	336	1190	309.9	22.42	6.78	1261	2423	287.5	1189	177.3	31.43	113.4	12.02	61.4	10.12	24.63	3.01	16.39	2.33	2.38095	0.130385	0.768	0.026	285.546	89.4837
Spot 120	221.3	343.2	90.9	1.21	1.32	5.06	19.6	4.05	30.2	12.7	3.52	15.8	2.15	13.63	3	9.75	1.263	7.44	1.202
Spot 121	312.6	229.1	911	6.45	27.24	11.94	85.7	23.73	220.6	109.8	21.47	156.4	23	154.7	32.01	92.7	13.57	86.1	14.22	15.4799	0.551141	0.254	0.017	304.651	13.6816
Spot 122	539.8	325.5	120.9	51.26	29.54	458	590.3	48.67	207.4	34.5	9.33	33.9	3.86	22.68	4.36	11.92	1.436	8.85	1.698	10.1937	0.311733	0.43	0.018	327.552	17.0477
Spot 123	538.6	330.4	1350	19.17	8.88	1393	3092	420.7	2004	397.7	39.31	349.6	46.02	276.4	50.99	132.1	16.43	86.4	11.66	10.8814	0.50914	0.413	0.031	318.997	26.5408
Spot 124	563.2	396.7	455	12.61	6.216	1023	2112	279.2	1331	237.5	21.3	170.1	17.89	96.1	17.19	43.55	5.29	28.12	3.84	8.54701	0.336036	0.436	0.031	385.846	31.5641
Spot 125	391.9	1267	333.7	40.4	15.19	1121	2117	268.2	1220	213.1	24.63	153.4	15.76	78.8	12.81	29.64	3.183	15.99	2.135	6.98324	0.214569	0.542	0.023	353.644	27.9599
Spot 126	368	301.4	200.8	63.9	26.91	1052	1285	91.9	333.8	47.5	13.88	43.9	5.29	31.95	6.85	20.03	2.87	20.19	4.05	13.4953	0.40067	0.291	0.017	327.871	13.6976
Spot 130	599.3	682	1367	26.02	7.32	948	2270	360.6	1710	380.1	45.84	363.4	45.08	266.3	48.66	123	14.8	82.9	10.32	4.34028	0.156356	0.66	0.029	357.689	53.8524
Spot 131	309.1	377.3	351.7	27.28	16.73	781	1557	177	696	121.9	30.56	110.8	12.91	73.9	13.28	34.35	4.35	26.4	3.88	11.534	0.452315	0.346	0.021	346.379	19.4238
Spot 132	1027	293.8	147.4	53	21.08	750	958	80.3	286.1	44.9	10.87	47.8	4.89	28.61	5.5	15.11	1.715	10.82	1.862	9.56938	0.302191	0.476	0.022	311.135	20.5191
Spot 133	550	219.9	231.1	0.274	0.577	71.1	300.7	60	351.9	82.8	25.04	74.4	8.47	47.9	8.61	21.81	2.568	14.45	2.018
Spot 134	622.5	949	309.8	17.64	6.917	632.4	1538	208.2	912	171.2	23.93	137.1	14.09	73.1	12.28	28.62	3.18	17.42	2.077	5.51876	0.234517	0.64	0.033	306.599	48.6854
Spot 136	1305	439.6	211.8	3.19	1.549	144.1	430.4	65.3	309.8	65.8	14.85	64.5	7.57	42.8	7.42	19.28	2.525	15.17	2.192	1.41243	0.107728	0.809	0.046	236.005	259.038
Spot 137	707	591.7	795	15.97	11.05	468.2	1253	183.7	921	217.2	39.67	224.8	28.34	166.4	30.23	74.5	8.56	47.6	5.93	8.86525	0.353667	0.463	0.025	347.847	25.8255
Spot 138	457	376.3	132.5	2.95	0.655	3.34	14.04	2.7	17.8	7.58	2.51	13.75	2.63	19.2	4.76	16.52	2.58	17.99	2.91
Spot 139	369.7	716	1233	45.5	5.05	1384	2842	411	1843	416.1	72	397.3	51.18	287.2	49.5	110.3	11.76	59	6.74	6.64452	0.344367	0.612	0.042	286.821	51.5669
Spot 140	614.6	1056	522.9	23.42	15.71	786	1922	298.5	1300	239.1	34.75	174.8	18.24	93.7	16.22	38.6	4.75	26.85	3.311	5.96659	0.178001	0.621	0.019	308.632	27.3292
Spot 143	419	318.3	155.8	16	24.19	201.7	431.2	51.8	211.3	37.5	8.95	35.88	4.5	27.29	5.48	14.47	1.888	12.37	1.931	12.4378	0.464097	0.317	0.019	339.392	17.1899
Spot 147	736.8	576.7	1222	5.47	1.612	457.6	1324	209.7	1116	296.9	62.4	317	42.79	251.9	46.34	111.7	12.89	67.9	8.84	5.10204	0.728863	0.511	0.076	537.867	133.597
Spot 148	346.8	2005	878	6.79	0.354	22	71	13.47	93.5	45.7	15.44	100.9	19.14	146.1	31.02	78.5	8.75	38.7	4.38
Spot 149	569	562.9	262.3	5.97	1.467	417.1	1088	143.5	648	113.4	14.66	78.3	9.05	50.3	9.37	25.01	3.24	19.01	2.85	6.84932	0.60987	0.525	0.093	380.638	108.76
Spot 151	332	477	97	0.117	0.466	0.756	2.97	0.675	6.12	3.98	1.76	8.36	1.77	14.3	3.28	10.8	1.6	10.9	1.82
Spot 152	264.2	2343	396	5.2	0.738	31	115	20.29	127.5	47.5	12.53	59	9.18	60.4	13.12	37.86	5.01	31.53	5.12
Spot 153	345.5	391.2	736	21.56	7.84	272.1	821	119.3	606	144.4	30.84	147	20.53	129.4	26.87	74.6	10.27	62.1	10.43	10.0503	0.858564	0.454	0.036	313.411	38.3144
Spot 154	1000	308.7	1746	16.57	3.125	1914	4415	633	2813	556.8	22.36	460	60.65	350.1	64.99	159.9	18.97	98.2	12.31	2.1322	0.104564	0.769	0.041	323.067	151.289
Spot 156	368.8	405.3	312	207	117.8	1479	2089	186	636	88	24.03	73.3	8.53	50.3	10.37	29.58	4.2	28.25	5.5	16.7084	0.418758	0.1695	0.0063	321.687	8.46965
Spot 157	695.6	600.9	387	24.19	8.91	528.8	1421	194.6	924	182.8	37.29	149.4	17.44	85.1	13.54	29.24	3.33	18.92	2.76	3.99202	0.141832	0.695	0.03	316.888	60.3943
Spot 158	472	375.6	159	4.23	0.382	43.5	148.8	20.7	124.8	41.2	9.69	44.8	5.6	32.8	5.69	14.54	1.69	9.51	1.521
Spot 160	450.5	1224	332.3	2.98	0.682	267.4	720	109.4	601	141.1	43.92	137	15.8	81.1	13	27.57	2.8	13.25	1.661	4.60829	0.743273	0.52	0.12	582.561	212.334
Spot 161	377.8	1829	109.2	37.8	21.3	356	658	75.3	332	60.8	19.03	49.6	5.43	26.3	4.05	8.49	0.912	5.29	0.918	8.17661	0.320914	0.505	0.031	336.902	32.1904
Spot 162	625.4	348	1380	196.8	117.7	691	1998	290.8	1391	333.9	25.69	312.2	44.84	276.2	52.33	137.8	17.23	91.6	12.58	15.8128	0.40007	0.1986	0.0087	325.484	9.17404
Spot 163	536.9	405.6	244.9	19.51	29.91	127	411.1	62.2	309.6	69	15.74	62.1	7.51	43.32	8.64	25.13	3.59	22	3.69	14.7275	0.433801	0.157	0.015	370.929	13.2614
Spot 165	338	916	1260	33.98	10.08	552	1617	248.6	1388	407.5	107.9	414	53.1	279.5	43.96	92.1	9.79	52.5	6.9	2.83286	0.128402	0.779	0.021	194.761	62.8318
Spot 166	218.2	151	83.4	0.271	0.595	17.8	64	10.4	62.8	18.6	6.92	18.84	2.56	15.88	3.13	8.85	1.075	6.7	1.13
Spot 168	1100	490.4	176	4.51	1.774	172.1	479	72.9	407.7	89.5	31.55	84.5	8.33	40.68	7.15	15.51	1.61	7.92	1.039	8	0.768	0.472	0.074	377.207	79.0567
Spot 169	198.6	1361	783	9.66	0.703	108.9	412	79.3	505	175.2	40.5	197.1	26.22	151	24.68	55	5.66	26.1	2.74
Spot 170	265	870	230	7.16	1.276	434	877	101.3	417	73.6	18	67.7	8.41	48.5	8.81	21.1	2.51	13.07	1.759	1.89394	0.150654	0.788	0.05	272.835	208.566
Spot 171	407.8	182.6	720	0.156	13.12	10.5	66.2	18.87	167.2	94	8.23	153.8	24.19	152.4	28.59	67.2	7.62	39.65	5.3	8.34725	0.320512	0.507	0.028	327.961	28.9531
Spot 172	3840	161.5	2891	4.42	13.32	301.1	950	151	731	290.1	32.37	373.8	74.8	517.7	97.4	252.8	32.89	189.7	23.13	5.97015	0.206728	0.647	0.031	272.4	42.1883
Spot 173	382.1	346.9	474	91.3	30.86	831	1695	188.9	783	137.4	26.33	129.6	15.55	89.3	17.46	46.4	5.87	35.2	5.4	13.8696	0.500153	0.308	0.019	309.5	15.3215
Spot 174	111.9	375.7	1063	66.5	0.869	470.5	1825	324.2	1798	505.5	126.6	504.8	60.63	290	40.63	72	6.37	28.69	3.45
Spot 175	595.6	332.2	143	25.4	16.5	445	751	71.5	251	33.1	12.1	32.2	3.25	20.9	4.49	13.7	1.88	11.2	2.28	9.40734	0.44249	0.511	0.026	286.916	25.5202
Spot 176	474.5	491	379	6.37	1.423	275	749	104.6	506	108.9	7.66	103.6	13.01	75.8	14.39	37.8	4.82	28	3.92
Spot 178	861	147	5778	76.4	7.94	1046	3822	706	3306	936	66.5	1008	158	985	188.8	507	68.7	406.7	52.03	2.27273	0.18595	0.73	0.029	462.283	105.4
Spot 179	436.9	255.3	709	56.7	36.62	279.2	930	150.8	797	211.3	13.49	227.7	27.06	155	27.83	64.3	6.89	34.85	4.25	17.0068	0.520616	0.222	0.015	292.139	11.1778
Spot 180	882	619.5	657.8	13.24	4.665	505.5	1423	222.1	1142	249.6	70.1	246	26.99	146.9	25.76	60	6.67	36.49	4.93	7.06714	0.349611	0.569	0.049	318.524	55.9172
Spot 181	586.4	278	1174	2.022	0.665	243.3	698	116.7	643	194.6	38	254.7	34.97	226.7	42.92	107.5	12.89	73.2	9.12	2.76243	0.343396	0.83	0.11	20.4573	324.788
Spot 182	525.5	243.3	318.6	30.9	10.12	376.8	626	68.1	281.1	54.7	15.59	61.1	7.39	46.9	10.42	31.2	4.59	34.17	6.41	12.9366	0.71963	0.378	0.04	289.398	28.7918
Spot 183	142.7	607	58.3	0.876	0.198	14	13.99	4.92	25.8	7.22	2	8.63	1.235	8.39	1.885	5.08	0.637	3.78	0.56
Spot 185	246.6	234.4	110.4	7.96	5.34	72.4	183.7	27.73	141.8	38.5	8.08	42.8	5	24.9	4.33	9.74	0.983	5.37	0.809	12.9199	0.751157	0.409	0.054	270.838	36.0593
Spot 186	425.7	1193	580	88.5	3.34	282.6	875	146.5	769	223.4	55.4	243	25.98	131.8	21.18	46.7	4.91	25.6	3.11
Spot 187	269	1462	519	13.3	0.228	37.7	141.8	26.64	175.7	74.4	20.03	122.7	18.19	113.5	20.44	44.3	4.64	20.04	1.799
Spot 188	281.7	1344	125.4	0.69	0.0403	2.35	9.14	1.81	12.98	8.09	2.23	17.36	2.643	18.13	4.23	12.78	1.562	8.08	1.161
Spot 190	296	283	505	68.9	39.95	314.3	1048	142	728	169.3	33.1	166.1	19.83	112.8	19.65	49.5	5.98	34.44	4.88	11.9474	0.428223	0.27	0.019	383.716	18.1921
Spot 191	1703	256.9	1197	5.31	18.34	247.8	853	146.2	848	310.1	29.98	330.3	45.71	255.1	43.39	105.4	13.69	77.5	10.44	7.72201	0.298147	0.562	0.03	297.99	32.5507
Spot 192	769.6	104.9	29.4	0.0152	0.024	0.072	0.305	0.078	0.55	0.244	0.097	0.79	0.214	2.58	0.89	4.36	1.105	9.75	1.947
Spot 195	342.1	419.8	237.1	17.4	7.87	362.4	854	100.2	449.2	78.9	18.5	71	8.32	46.9	8.55	22.16	2.8	15.49	2.41	11.0988	0.529686	0.347	0.029	359.265	26.22
Spot 197	483.6	348.5	114.1	99.9	48.13	694	1193	99.8	370	46.3	16.1	38.6	3.62	20.72	4.2	11.54	1.42	9.11	1.887	8.98473	0.250248	0.2071	0.0084	561.839	16.7953
Spot 198	368	462.2	1233	64.5	13.95	552	1820	299.4	1746	507.8	134.8	503.5	62.91	322.2	47.79	90.6	8.67	42.9	5.6	6.07903	0.221727	0.587	0.029	348.406	39.2727
Spot 199	70.2	4796	663	4.34	0.141	43	185.5	35.85	244.5	133.2	37.09	203.4	32.5	177.7	26.21	57.1	6.15	27.61	2.79
Spot 200	788.6	1124	403.8	43.86	17.03	559.7	1381	174.7	872	176.4	21.84	154.3	17.26	91.3	16.33	38.6	4.51	23.82	3.34	11.8624	0.464364	0.282	0.023	378.652	20.7951
Spot 201	1587	707	685	25.66	3.35	269	941	147.4	889	251.9	62.4	253.3	31.69	165.6	26.66	54.5	5.7	27.85	3.48	1.22549	0.0525639	0.781	0.034	581.119	210.726
Spot 202	279.9	2757	525	42.3	0.494	315	914	128	697	196.3	45.5	192.5	23.76	123.4	19.09	36.4	3.15	12.85	1.282
Spot 203	858	91.7	3298	31.05	20.25	231.1	1085	211	1329	596	19.65	706	114.6	717	129.7	343.7	46.6	284.6	38.49	5.15464	0.345414	0.461	0.028	607.836	56.484
Spot 204	218	461	77.2	0.069	0.062	0.256	1.42	0.312	2.59	1.57	0.618	4.07	0.889	7.61	2.26	8.22	1.096	6.53	1.07
Spot 205	551.3	489.4	256.9	92.8	33.4	739	1694	179.3	733	110.2	23.86	80.9	9.53	52.79	9.52	24.88	3.13	17.63	2.87	12.87	0.546603	0.292	0.017	343.127	17.6136
7226/2-1 1748, Kobbe Formation, Bjarmeland Platform
A_242	76.29	1146.7	245.37	41.31	6.15	242.39	247.16	24.54	137.44	128.3	51.45	217.87	24.04	88.8	10.77	19.51	1.827	9.89	1.235
A_243	211.46	768.57	110.17	15.05	23.59	329.72	784.07	95.77	406.69	60.59	18.68	40.48	4.15	17.89	3.55	8.83	1.101	7.18	1.286	12.8123	0.218326	0.50005	0.00667	216.488	11.3364
A_244	250.96	871.77	92.58	19.17	8.4	136.7	444.89	66.77	314.91	51.05	10.39	40.12	4.41	19.32	3.26	7.45	0.836	4.81	0.672
A_245	193.5	682.19	270.09	1.96	0.105	3.62	10.82	1.99	11.47	5.97	1.5	11.99	3.24	30.77	9.38	27.49	3.56	17.77	1.94
A_246	489.04	428.12	648.6	16.45	9	101.26	295.85	49.34	297.14	118.11	29.76	153.22	23.68	127.11	21.74	47.73	5.63	31.83	3.48	5.25928	0.090725	0.68014	0.00893	258.706	29.5691
A_247	266.54	740.28	672.89	3.42	0.078	2.14	8	1.87	14.75	9.77	4.01	31.28	8.19	84.09	23.63	62	6.47	32.62	2.78
A_248	1973.25	586.41	1040.99	35.58	10.33	602.27	1575.66	233.31	1170.47	288.38	48.49	289.6	42.91	230.57	41.06	88.61	9.59	50.33	5.81
A_249	420.42	2705.84	266.7	23.16	15.37	551.46	1064.9	130.07	591.64	118.09	28.31	93.79	11.83	57.64	11.05	25.88	3.27	19.5	2.45	8.9662	0.159178	0.42502	0.00686	377.212	17.8953
A_250	422.84	570.17	167.55	8.59	2.97	50.36	204.24	39.49	258.21	69.87	10.55	68.62	8.38	39.91	7.13	15.55	1.873	9.9	1.432
A_251	243.68	443.97	525.29	4.89	2.49	304.56	809.77	121.33	653.24	150.24	32.41	152.72	20.43	106.27	20.66	45.01	5.28	29.66	3.66	13.5428	0.317295	0.34434	0.01173	295.959	19.2174
A_252	462.55	399.68	665.88	157.69	15.39	376.78	1108.6	161.67	853.42	214.4	57.5	222.8	31.39	155.31	26.31	55.46	6.05	36.5	5.56	6.74946	0.115255	0.58961	0.00757	309.28	21.22
A_253	26.52	809.96	428.46	0.334	0.038	14.58	60.64	14.44	133.21	101.5	45.95	168	26.06	128.04	18.5	32.1	2.75	10.56	0.963
A_254	739.3	327.69	526.3	46.93	54.33	631.42	1574.07	197.11	835.94	151.38	20.19	120.81	16.23	84.9	17.85	49.65	7.08	52.19	8.34	14.59	0.24267	0.31816	0.00391	288.807	10.4488
A_255	1209.61	352.98	288.94	13.08	24.22	102.02	298.27	45.94	241.71	62	16.21	60.34	8.86	51.22	10.78	29.32	3.8	28	4.4	13.0429	0.226256	0.3062	0.00481	330.133	12.7151
A_256	294.44	1046.33	78.46	13.32	4.67	121.05	331.18	42.77	195.33	34.67	8.47	30.99	3.78	17.16	2.85	5.36	0.526	2.72	0.345
A_259	228.81	1244.43	443.48	24.19	1.85	235.3	564.26	78.79	385.35	95.07	21.85	104.04	16.09	89.03	17.62	38.1	4.04	21.58	2.54
A_260	779.01	846.01	639.32	27.68	6.59	458.3	1094.72	154.76	797.02	193.27	28.24	184.8	25.71	140.68	25.85	57.66	6.59	37.68	4.77	4.66701	0.0803718	0.64588	0.00845	356.074	31.9295
A_261	469.02	543.8	387.88	65.27	28.9	557.55	1332.6	171.84	772.78	141.5	27.14	116.34	15.59	80.69	14.49	34.67	3.9	24.73	3.5	13.9723	0.236224	0.31652	0.00437	302.465	11.2819
A_262	488.7	427.55	737.5	12.76	3.63	490.86	1402.65	216.36	1178.31	262.77	60.05	248.57	31.06	159.4	29.64	64	7.08	37.25	4.58	8.55432	0.171233	0.53994	0.01164	289.005	24.4129
A_263	354.98	421.21	707.52	62.3	29.11	470.56	1357.97	189.6	892.08	195.04	47.14	173.14	25.46	136.34	26.63	67.07	8.4	54.98	7.4	14.7951	0.24954	0.30097	0.00416	293.911	10.7852
A_264	228.46	670.99	37.73	2.49	0.273	6.81	20.46	3.51	20.27	6.97	2.01	8.71	1.338	7.19	1.371	3.2	0.409	2.11	0.298
A_265	323.31	501.84	339.07	106.8	72.13	323.41	778.91	106.86	533.27	112.84	28.95	104.46	13.93	72.8	13.21	30.51	3.65	22.05	3.19	16.276	0.270208	0.19913	0.00257	316.055	10.6409
A_266	427.82	504.63	139.95	27.36	11.8	566.77	1288.92	144.39	558.22	78.68	25.39	57.51	6.82	31.2	5.24	11.99	1.413	9.52	1.401	12.4891	0.219927	0.37954	0.00612	298.827	13.0213
A_267	482.82	419.2	756.04	5.23	3.57	523.34	1276.42	171.46	855.77	194.84	32.37	199.66	28.23	154.25	29.83	71.37	8.53	49.83	6.37	5.82649	0.112707	0.637	0.01185	293.757	34.4029
A_268	69.88	2067.98	216.88	0.407	0.027	55.59	236.77	49.5	345.79		28.97	110.89	13.08	59.05	8.78	15.42	1.418	5.3	0.471
A_269	616.5	337.96	453.37	5.18	12.15	48.8	169.24	31.68	196.9	71.64	10.33	85.42	13.03	69.98	13.54	34.49	4.55	29.26	4.04	6.44081	0.114081	0.67196	0.00979	219.138	26.2987
A_270	633.36	379.25	223.03	70.05	41.11	469.05	891.17	92.98	390.12	73.43	20.52	70.89	9.03	42.29	8.15	20.69	2.62	18.63	3.47	16.0953	0.26942	0.27746	0.00363	281.686	10.0023
A_271	480.2	561.73	252.29	49.58	32.33	1005.72	1996.79	226.74	890.85	126.01	22.73	88.97	10.17	50.51	9.5	23.28	2.85	17.01	2.56	13.9198	0.238327	0.29539	0.00437	315.455	11.772
A_272	221.83	1254.33	65.33	22.69	6.19	230.19	546.14	66.17	293.21	44.01	13.4	33.95	3.39	15.3	2.36	5.62	0.581	3.31	0.565	5.07898	0.0866746	0.69167	0.00871	249.312	29.9192
A_273	704.31	959.52	56.76	7.06	9.26	556.75	858.05	81.64	313.97	38.69	6.47	27.92	2.43	11.82	2.11	4.41	0.479	2.67	0.429
A_274	75.09	1516.88	911.16	67.22	34.52	701.59	1636.26	220.74	1077.75	296.49	61.73	298.03	40.09	201.05	35.64	84.17	10.93	70.81	10.35
A_275	668.84	316.24	2761.8	86.26	10.7	352.76	1442.7	286.91	1878.35	767.07	82.38	855.59	141.42	742.07	121.68	259.3	29.09	167.14	19.48
A_276	132.08	932.77	152.87	10.21	1.082	23.5	80.09	14.23	89.8	30.71	10.08	37.22	5.58	31.38	6.12	11.81	1.16	6.41	0.738
A_279	66.93	339.31	976.64	472.08	12.65	1393.76	3770.87	513.48	2284.51	409.3	26.6	297.15	37.91	197.92	37.2	94.67	12.89	78.9	10.36	4.28174	0.0744331	0.60488	0.00828	470.03	34.6621
A_280	367.53	903.83	325.05	0.037	0.103	0.393	1.484	0.353	3.02	2.77	1.158	9.81	2.92	29.42	10.03	30.97	3.58	17.43	1.612	8.50919	0.152053	0.6122	0.00944	221.623	19.8467
A_281	397.19	414.43	105.96	5.11	1.029	14.69	46.86	7.47	42.6	14.38	4.09	15.48	2.49	15.94	3.5	11.51	2.15	17.65	2.67
A_282	104.71	1712.37	121.05	47.33	67.44	126.47	399.09	58.31	302.34	58.68	13.35	45.45	5.02	24.3	4.58	11.6	1.415	9.46	1.369	12.4875	0.241704	0.24989	0.00629	379.636	16.3932
A_283	129.75	623.24	107.29	14.04	2.13	7.97	30.06	5.96	41.36	17.41	5.49	25.35	3.61	19.81	3.7	9.2	1.062	7.62	1.174
A_284	231.76	2759.81	734.25	74.61	4.19	236.51	779.8	133.38	764.43	225.95	66.25	243.02	36.2	184.95	30.44	54.54	4.4	18.53	1.864
A_285	356.94	718.28	340.33	17.32	11.92	67.11	232.71	39.56	232.67	65.3	18.57	72.82	10.11	57.88	11.45	28.5	3.69	23.61	3.93	14.6735	0.243303	0.15835	0.00215	371.572	12.3219
A_286	265	665.36	760.61	28.63	17.16	258.28	750.95	108.86	529.81	129.56	21.92	145.25	22.55	127.6	27.38	69.71	8.68	52.49	6.78
A_287	325.36	173.51	326.27	5.9	2.04	155.83	549.23	88.79	473.76	97.22	24.23	86.62	11.84	63.35	12.66	31.23	3.95	24.13	3.67
A_288	387.58	1194.38	457.96	13.31	2.14	510.06	1185.49	163.25	811.96	176.47	40.49	156.51	19.89	100.47	17.52	35.93	3.99	21.57	2.53	11.9746	0.200748	0.47177	0.00574	250.734	11.5435
A_289	423.02	545.46	390.17	130.81	30.96	678.7	1538.69	194.66	905.03	163.08	19.62	130.31	15.41	77.1	15.32	37.43	4.67	29.62	4.14	2.56075	0.0424268	0.70185	0.00774	500.312	51.9387
A_290	1193.96	317.98	1422.61	2.93	4.26	224.92	567.45	82.99	438.67	159.41	6.71	213.76	39.17	247.47	49.24	129.03	16.42	97.09	11.31	4.64468	0.0960002	0.652	0.01365	346.888	48.3436
A_291	351.22	1149.12	606.1	81.86	11.73	169.59	471.91	67.75	357.82	101.43	28.96	108.05	16.14	105.51	22.65	50.94	4.93	24.38	2.74
A_292	2957.46	365.34	637	7.55	34.95	151.32	264.78	41.71	208.24	65.79	13.31	91.72	16.59	101.94	21.13	56.98	7.57	48.25	6.7
A_295	517.95	628.33	406.34	194.26	106.1	117.58	535.76	109.79	685.63	164.63	48.31	128.74	16.12	83.5	15.43	35.92	4.51	30.11	4.21	6.32471	0.134807	0.48097	0.0119	468.257	34.7343
A_296	455.86	195.75	1062.54	28.76	19.84	112.23	428.66	85.95	558.39	182.95	27.14	217.67	32.91	187.4	38.76	96.87	12.29	75.66	9.96	12.1669	0.207248	0.34519	0.0049	328.878	12.7967
A_297	719.1	719.74	165.92	12.43	6.84	169.21	508.96	70.74	327.79	60.48	13.01	52.32	6.26	31.3	5.73	12.52	1.573	9.37	1.404
A_298	60.79	198.8	77.31	0.82	0.031	1.467	5.09	1.184	9.3	5.52	2.1	13.33	2.12	13.29	2.97	6.85	0.732	3.46	0.428	1.04503	0.0178993	0.60112	0.00726	2619.76	137.447
A_299	303.97	2718.97	214.89	26.3	6.17	384.63	769.11	97.63	467.99	96.31	26.16	83.24	10.19	50.28	8.45	18.78	2.05	11.2	1.506	4.82928	0.079528	0.66394	0.00722	311.912	27.2358
A_300	1018.58	270.28	699.48	23.73	14.85	652.5	1473.28	187.35	869.38	171.55	17.09	161.79	22.12	123.16	24.83	63.85	8.61	53.5	7.14	17.0445	0.284704	0.1902	0.00252	306.002	10.3468
A_301	408.44	4958.08	147.17	28.91	19.84	389.17	1218.81	161.84	704.87	110.38	29.06	72.91	8.2	35.56	5.58	12.04	1.299	7.09	0.959	15.9084	0.278384	0.33776	0.00549	255.22	10.4357
A_302	864.14	350.02	396.19	16.12	9.54	126.04	409.4	66.4	365.53	87.17	19.35	82.34	11.93	67.74	14.21	38.45	5.26	36.28	5.39
A_303	1011.77	275.37	642.97	10.79	3.86	480.2	1205.65	164.35	814.13	179.7	30.38	173.55	24.57	130.22	24.58	56.69	7.21	44.6	6.01
A_304	49.45	998.56	149.45	0.231	0.0001	0.105	0.797	0.339	4.42	18.36	13.9	92.57	14.22	55.75	7	12.22	1.331	5.58	0.592	3.99313	0.0687234	0.69479	0.00904	317.245	38.8034
A_305	1453.61	259.67	1880.08	12.31	11.86	194.53	507.45	77.96	431.42	193.39	25.26	288.2	50.73	287.73	51.41	123.35	16.16	101.02	12.08	8.56164	0.14587	0.49272	0.00659	332.866	16.7927
A_306	521.63	379.02	355.65	27.65	21.14	165.43	478.23	70.01	381.61	88.84	20.68	87.14	11.21	61.77	12.48	32.5	4.4	31.31	5.12	6.33874	0.106476	0.64955	0.00786	252.377	22.4678
A_307	559.04	813.71	322.27	26.87	10.34	586.16	1221.25	153.9	720.86	143.17	26.27	113.93	13.8	69.28	12.98	29.34	3.22	20.91	2.87	7.75675	0.136579	0.54414	0.00815	315.181	20.2143
A_310	469.78	410.98	87.71	0.081	24.41	11.92	65.61	15.15	98.64	24.53	6.7	22.28	2.94	15.75	3.09	7.63	1.058	6.81	0.947	4.47447	0.0828866	0.68437	0.0112	299.942	41.8428
A_311	476.27	373.09	817.46	24.98	25.35	435.53	1509.54	237.2	1190.44	259.09	16.66	210.67	28.93	155.57	28.48	71.62	9.2	56.11	7.15
A_312	587.68	2004.01	87.65	15.76	4.2	664.22	1067.66	98.72	380.23	48	10.19	39.36	4.21	19.33	3.22	7.03	0.748	4.2	0.766
A_313	495.19	1874.43	107.71	1.99	6.86	35.27	134.83	24.98	156.9	42.65	10.8	36.46	4.57	19.26	3.75	8.77	1.017	6.45	0.935	10.0796	0.171702	0.49669	0.00654	278.801	14.2238
A_314	1179.58	285.72	202.65	1.73	27.22	20.51	96.66	21.69	165.3	45.88	5.84	50.98	6.97	37.68	7.78	19.43	2.64	17.2	2.63	13.1891	0.247014	0.2492	0.00561	359.993	14.8102
A_315	272.28	528.02	691.12	137.21	27.19	1102.78	2173.3	268.3	1273.86	268.87	59.96	249.2	33.33	168.88	27.7	52.13	5.13	26.42	3.2	14.8943	0.252896	0.27367	0.00402	306.273	11.127
A_316	1006.29	479.11	381.71	8.77	8.92	83.78	231.19	36.35	213.83	70.84	22.27	85.44	11.97	68.08	13.97	34.83	4.47	29.79	4.76	14.9723	0.257795	0.32806	0.00495	276.258	10.8027
A_317	373.78	363.51	317.76	22.53	6.42	215.07	443.99	62.09	319.01	80.78	24.19	87.94	13.34	73.17	12.44	25.16	2.43	12.33	1.574
A_318	552.87	398.34	533.04	26.2	34.3	153.39	489.4	80.69	457.09	116.38	31.26	113.95	15.64	87.73	18.27	51.13	7.36	51.77	8.8	7.78695	0.136432	0.65329	0.00939	199.439	21.2106
A_319	541.39	1850.97	84.19	14.95	1.89	171.6	483.29	66.23	300.19	48.22	12.44	37.39	4.42	21.07	3.3	5.92	0.536	2.31	0.269	16.3132	0.279427	0.174	0.00304	327.262	11.4157
A_320	311.71	2617.57	249.66	39.38	5.95	641.9	1251.32	149.4	644.61	124.55	32.2	97.31	12.05	56.69	9.85	22.2	2.5	15.9	2.1	12.07	0.203959	0.46464	0.00603	253.443	11.8402
A_321	426.73	549.61	362.12	65.72	116.33	232.8	795.59	129.2	675.44	135.22	28.06	107.27	14.59	73.74	12.89	31.07	4	25.27	3.85	5.75937	0.0998428	0.62387	0.00861	316.223	26.7065
A_322	395.28	413.73	434.43	14.5	3.59	107.77	383.77	69.42	437.16	121.57	41.87	136.31	17.77	95.13	17.63	39.34	4.04	22.72	3.26
A_323	522.59	702.59	252.06	14.25	3.54	409.65	886.34	108.91	483.42	91.49	17.62	74.59	9.56	48.47	9.7	24.74	3.27	20.61	2.93	13.089	0.221005	0.34903	0.0047	303.411	11.6668
A_327	393.22	1780.4	187.23	10.42	2.88	392.34	817.07	100.99	468.19	88.47	24.56	67.85	8.02	38.72	7.28	16.54	2.02	12.89	1.779	9.26526	0.17169	0.41139	0.00777	376.444	18.9978
A_328	617.92	246.64	1270.28	42.68	6.12	1321.9	2963.78	381.09	1751.78	359.76	33.4	319.92	45.94	252.77	49.56	119.86	15.1	88.02	11.46	17.5994	0.291156	0.19759	0.00248	293.178	9.83004
A_329	147.5	1805.91	243.23	52.76	1.174	41.34	140.62	24.66	151.24	52.64	17.24	70.04	10.22	52.73	9.08	18.35	1.817	9.26	1.447	12.566	0.257383	0.40513	0.0101	280.94	17.0146
A_330	261.66	555.69	1249.02	94	16.51	805.9	2250.7	322.1	1592.84	375.74	50.24	340.16	48.77	252.21	45.9	110.61	14.1	92.74	12.68	5.26759	0.0968389	0.61308	0.01017	364.377	33.4314
A_331	184.48	643.54	160.92	11.09	0.727	23.53	70.23	12.25	69.88	22.46	7.13	28.35	5.19	31.94	6.52	15.41	1.918	11.69	1.673
A_332	180	1266.52	117.37	0.061	0.104	1.74	8.69	2.38	15.72	8.85	3.17	18.07	2.54	15.04	3.7	10.98	1.328	8.68	1.39	7.90576	0.168753	0.4545	0.01171	399.21	28.3179
A_333	330.69	548.9	239.58	35.64	7.57	902.09	2083.41	267.54	1236.8	194.41	21.22	127.36	13.42	60.8	9.3	19.1	2.1	11.44	1.7	4.78767	0.0836644	0.68768	0.00954	272.844	34.1508
A_334	2393.97	1462.06	887.52	3.38	22.14	358.21	1262.19	209.75	1104.84	251.44	48.35	189.83	28.78	164.6	31.4	83.07	11.49	73.26	9.76
A_335	384.06	363.68	342.52	43.57	71.6	450.33	1063.53	131.61	590.07	107.42	17.93	91.07	12.09	64.66	12.83	31.87	3.9	25.05	3.53	3.64153	0.0606015	0.62422	0.00724	515.751	36.1783
A_336	2196.22	80.85	4183.03	18.98	69.18	345.38	1229.6	204.39	1102.15	456.66	19.44	594.56	127.89	845.45	165.85	426.85	57.64	368.64	46.48
A_337	944.08	1133.63	570.72	9.29	6.19	47.48	181.32	30.95	192.6	84.67	23.46	120.65	21.68	123.95	23.04	51.62	6.19	35.05	4.75
A_338	189.22	389.55	140.39	9.86	0.878	24.41	70.36	11.48	64.99	21.5	6.44	27.4	4.36	26.52	5.27	12.32	1.176	6.35	0.726
A_339	224.13	187.85	642.76	20.78	13.01	72.65	299.44	61.09	416.45	141.7	26.21	164.76	25.59	137.26	25.76	57.96	6.44	36.82	4.85	9.86193	0.168256	0.58869	0.0077	209.808	14.8771
A_340	175.78	2283.08	192.13	35.92	20.13	450.01	1296.94	175.38	819.06	126.37	33.99	86.07	9.19	41.47	6.59	14.81	1.567	10.35	1.585	18.2349	0.302584	0.17692	0.00248	291.871	9.79333
A_341	542.88	375.39	1174.25	6.75	29.56	313.07	1327.36	240.2	1340.97	347.12	29.71	292.36	43.39	232.14	42.7	104.95	13.72	80.6	9.9	13.8083	0.230711	0.33606	0.00435	294.972	10.9988
A_344																				6.11733	0.101413	0.46672	0.00543	502.752	21.6534
A_346	89.8	504.59	197.19	41.06	1.243	75.87	210.4	31.1	168.75	51.11	14.56	58.38	8.56	43.81	7.68	17.3	1.912	10.67	1.555	12.3213	0.217096	0.39918	0.00643	290.357	13.1288
A_348																				17.4917	0.29984	0.3631	0.00525	220.661	8.96235
A_349	716.87	433.22	254.82	42.86	13.8	189.18	451.85	59.99	293.95	73.04	22.35	79.76	11.75	59.05	10.17	20.35	2.2	10.92	1.7	0.0112068	0.00398928	0.86071	0.01273
A_351																				5.29998	0.0929772	0.52554	0.00777	495.36	28.5861
A_353																				5.62905	0.100128	0.21588	0.00413	879.004	31.981
7226/2-1 1380.5, Snadd Formation, Bjarmeland Platform
A_123	488.49	262.94	508.99	20.83	66.85	40.66	203.75	44.42	295.11	98.13	26.82	103.6	14.97	90.02	19.02	49.34	6.57	47.45	7.32	21.6497	0.356219	0.12313	0.00166	265.624	8.7126
A_124	921.46	383.11	6408.87	46.91	37.73	569.75	1955.55	333.35	1836.39	732.85	43.96	893.94	175.05	1113.85	228.17	609.03	86.77	561.84	69.29	6.35001	0.105242	0.65291	0.0075	247.504	21.6083
A_125	185.42	5433.38	244.72	15.07	5.43	867.95	1601.62	183.19	791.57	134.93	44.55	93.98	10.83	50.48	8.29	19.01	2.28	13.9	1.84
A_126	422.11	1268.49	68	0.0001	0.0001	0.194	0.828	0.201	1.57	0.78	0.432	2.36	0.775	6.81	2.41	9.1	1.66	14.91	2.37
A_127	119.19	2151.4	250.27	60.56	22.95	197.27	672.54	107.83	579.7	109.42	16.46	95.92	11.33	56.06	9.35	21.13	2.42	11.87	1.41	7.18081	0.119629	0.61508	0.00729	261.005	19.1173
A_128	1694.14	167.44	922.43	1.48	15.73	64.17	270.23	53.95	362.14	174.19	42.96	230.2	45.03	263.24	44.99	100.6	11.81	68.61	7.78	7.52219	0.126181	0.56251	0.00696	305.607	18.3592
A_129																				13.0959	0.228097	0.22351	0.00399	377.643	13.7678
A_130	87.82	2728.39	301.23	0.251	1.44	30.55	145.14	35.27	301.52	156.76	55.58	180.17	21.29	87.89	11.93	19.74	1.7	6.99	0.596
A_131	929.06	422.17	737.09	89.15	65.64	255.29	982.12	166.65	896.5	236.51	51.28	229.67	33.93	178.29	31.78	70.36	8.27	46.29	6.31	11.4626	0.18789	0.52631	0.00594	223.935	11.4255
A_132	285.11	854.03	445.65	3.33	1.01	73.28	228.84	31.35	172.19	56.78	13.88	83.28	12.06	68.81	15.88	41.33	4.97	30.6	4.36
A_133	251.94	1008.76	554.2	69.26	46.18	2422.8	4389.36	465.43	1809.51	294.29	37.17	210.33	24.16	112.27	19.56	46.87	5.87	33.62	4.23	19.8255	0.334094	0.19515	0.00308	261.484	9.04839
A_134	766.92	1518.34	152.46	78.16	5.79	1563.55	1684.1	116.81	358.22	44.69	16.22	40.11	4.58	22.01	4.53	11.5	1.44	9.86	1.689
A_135	240.27	233.09	831.49	41.95	43.02	297.42	828.94	119.58	614.94	156.64	11.24	177.26	26.42	153	31.09	78.59	10.09	62.15	9.17	20.1329	0.340479	0.24169	0.00355	239.398	8.49807
A_136	297.12	2227.99	183.59	49.04	24.23	841.54	1881.17	225.28	984.31	131.51	29.54	90	8.37	36.06	6.6	14.97	1.796	12.23	2.11	8.47889	0.141626	0.57805	0.00707	255.305	16.313
A_137	270.13	613.79	9.01	0.0001	0.028	0.156	0.425	0.056	0.38	0.0001	0.053	0.66	0.12	1.41	0.331	1.08	0.181	2.29	0.291
A_140	668.24	595.69	315.37	68.99	25.04	604.66	1364.83	171.39	792.87	152.98	26.79	134.82	16.82	80.21	13.14	26.86	2.77	13.58	1.575	8.82223	0.147102	0.26719	0.00354	520.967	18.0806
A_141	687.19	126.1	1206.26	1.286	3.06	183.82	827.43	162.51	1015.05	350.61	13.99	397.34	62.69	331.02	56.22	110.75	10.6	52.06	5.35	4.03421	0.0753526	0.69443	0.01156	314.457	47.4814
A_142	26.39	1043.99	22.18	81.11	51.69	29.31	64.87	8.07	35.59	7.47	1.61	7.21	0.913	5.12	0.934	2.22	0.312	1.29	0.155	24.0154	0.409484	0.18336	0.00304	220.039	7.69556
A_143	344.73	1188.4	215.66	15.6	12.47	234	682.26	98.19	498.5	102.07	21.53	80.06	8.6	39.43	7.12	18.07	2.05	13.09	1.93	3.77658	0.0658929	0.69145	0.00953	345.065	42.7388
A_144	261.25	390.64	56.55	16.49	17.67	151.13	367.75	42.69	184.73	28.17	6.37	23.74	2.16	10.36	2.04	4.47	0.56	4.24	0.778	9.3301	0.158432	0.56524	0.00739	242.525	15.4946
A_145	400.48	688.87	155.96	2.51	7.44	89.26	263.28	42.15	243.18	69.94	14.23	68.92	7.8	35.33	6	13.06	1.359	7.51	0.983
A_146	804.11	621.79	1093.45	277.21	37.3	439.97	1339.9	219.26	1236.06	405.83	125.79	440.47	67.64	332.29	54.1	102.95	9.96	52.67	6.11	14.2816	0.240679	0.2202	0.00324	348.352	12.0937
A_147	325.14	1062.28	192.66	71.29	40.87	183.23	600.49	92.06	467.86	84.17	33.06	64.32	7.36	32.89	6.24	14.89	1.81	12.63	2	4.78858	0.0814034	0.72688	0.00913
A_149	854.69	447.99	391.05	16.06	8.31	717.37	1251.28	131.79	550.52	98.47	19.07	91.16	12.91	70.32	14.64	37.44	5.16	32.19	4.64	11.5808	0.201172	0.30846	0.00495	370.162	14.3292
A_150	198.95	505.35	121.41	18.3	2.72	84.41	214.79	26.73	132.43	28.23	4.64	28.31	3.9	22.05	4.73	11.5	1.5	9	1.18
A_151	194.57	70.16	1269.3	20.79	7.51	20.68	74.13	14.88	111.11	57.65	27.06	129.83	30.47	220.16	49.11	121.19	16.87	108.9	12.78
A_152	483.13	552.14	1138.78	28.25	44.36	80.68	334.2	64.79	398.56	137.89	49.44	151.55	27.98	177.43	39.74	113.14	16.58	120.32	16.57
A_153																				6.74992	0.12256	0.41683	0.00737	512.128	24.7388
A_157	254.58	452.57	221.42	42.34	26.8	460.29	902.31	103	443.23	77.11	18.56	66.86	8.44	45.44	8.36	21.52	2.78	18.06	2.36	19.7394	0.342888	0.16048	0.00309	276.317	9.7862
A_158	948.33	188	1534.71	5	8.71	113.57	359.58	64.32	420.93	176.42	17.61	223.16	37.11	232.74	49.89	148.48	23.4	172.62	22.45	7.7815	0.136241	0.61904	0.0089	235.914	20.57
A_159	289.3	1354.72	1759.03	1271.56	33.78	633.54	2279.8	435.45	2763.78	975.38	322.07	1061.33	156.4	713.92	98.7	160.33	14.54	65.24	6.64	16.852	0.286831	0.42288	0.00575	200.832	8.83345
A_160	549.42	654.62	261.12	29.53	7.08	792.77	992.22	93.25	400.31	74.96	14.27	82.63	10.72	54.06	10.45	25.5	2.6	18.55	2.79	5.43213	0.0947206	0.67788	0.00949	253.411	30.1433
A_161	217.53	444.52	205.2	3.69	38.39	71.71	261.43	48.74	290.3	72.08	14.98	63.71	7.79	40.68	7.89	18.34	2.32	14.93	2.3	15.0331	0.250853	0.26356	0.00358	308.699	10.8534
A_162	1219.35	144.36	773.54	0.96	3.12	42.15	178.64	36.06	238.15	130.71	19.45	171.88	30.83	171.42	29.67	65.53	8.25	51.27	6.11
A_163	602.87	364.39	1250.44	11.56	11.26	66.85	274.68	57.61	404.77	194.62	44.53	248.64	39.29	222.14	42.04	105.25	14.28	95.92	13.5	7.19114	0.123593	0.61849	0.00835	256.721	21.1083
A_164	487.81	1904.22	95.7	4.79	13.59	234.28	673.5	94.69	449.89	64.79	16.58	43.13	4.3	19.1	3.36	7.3	0.847	5.36	0.899
A_165	228.99	283.5	345.8	33.88	30.07	171.31	534.04	80.92	435.61	99.04	14.77	93.6	12.54	68.84	13.08	32.08	4.21	26.06	3.43	15.2323	0.271467	0.34012	0.00594	265.321	11.2394
A_166	2104.71	326.66	1270.58	6.99	41.89	491.96	1392.35	204.51	1020	295.76	16.32	272.31	40.7	231.85	45.82	120.31	16.11	100.77	12.4	13.5556	0.227857	0.47618	0.00606	218.601	10.4318
A_167	445.19	761.41	315.2	18.67	5.55	688.13	1594.77	198.7	846.51	130.47	29.79	98.37	11.9	62.52	11.85	29.13	3.66	22.94	3.3	12.2895	0.234101	0.42181	0.00868	276.562	15.3069
A_168	886.41	98.57	1781.61	0.524	4.5	48.39	174.59	33.93	240.19	121.38	11.56	211.87	41.22	285.93	65.31	178.57	23.45	146.95	18.66	6.9633	0.124613	0.63346	0.00978	247.774	24.5926
A_169	331.09	320.75	815.66	31.67	23.44	510.99	1410.73	202.93	1012.6	226.45	27.11	215.21	31.01	166.4	32.1	74.27	8.6	47.62	6.26	11.7055	0.198677	0.41018	0.00551	298.302	12.6029
A_170	182.1	2129.35	58.48	17.81	5.44	90.23	260.54	37.63	187.37	33.55	8.92	27.25	2.63	14.06	2.26	5.47	0.579	2.66	0.343
A_171	642.64	508.27	276.56	122.67	61.44	501.26	916.01	101.9	458.41	102.84	31.53	99.73	13.22	66.47	11.93	27.43	3.35	19.01	3.28	17.646	0.292699	0.16858	0.00227	305.178	10.1835
A_174	4360.97	62.89	5141.59	34.56	95.17	687.25	2148.31	345.65	1818.83	681.63	2.52	804.93	153.6	945.36	191.77	485.06	63.54	389.65	47.37	14.245	0.233358	0.38861	0.00444	256.869	9.82048
A_175	237.3	517.23	615.72	52.84	20.86	467.42	981.3	125.86	630.7	145.35	21.92	154.7	21.37	118.37	24.49	58.61	6.91	43.39	5.82	12.5313	0.216707	0.38757	0.00587	292.774	12.5299
A_176	479.75	999.24	155.58	42.48	15.21	360.71	925.6	121	540.89	83.58	23.11	61.73	6.1	28.33	5.4	12.75	1.658	11.42	1.76	8.14133	0.139191	0.65244	0.00853	191.262	18.788
A_177	799.05	296.86	293.33	8.56	23.87	134.14	611.95	108.39	578.91	111.22	23.32	84.3	11.21	57.23	10.85	26.39	3.58	22.14	3.45	19.685	0.337126	0.19975	0.00344	261.508	9.27092
A_178	830.82	923.88	365.25	34.83	3.8	283.03	663.21	92.02	503.72	116.02	35.39	117.67	16	86.52	14.76	35.69	3.32	22.42	2.62	5.02917	0.0887768	0.68777	0.00989	258.571	33.5896
A_179	320.19	2383.91	88.71	3.04	7.27	44.01	188.95	38.03	245.31	60.83	17.6	43.59	4.31	18	3.18	6.18	0.86	4.64	0.629
A_180	399	254.36	15.85	0.0001	0.096	0.471	1.707	0.35	2.13	0.64	0.216	1.02	0.184	1.56	0.488	1.83	0.407	2.93	0.538
A_181	436.6	3144.46	989.33	14.73	7.07	618.73	1398.32	195.97	1002.61	246.78	40.49	233.8	32.34	181.7	36.33	91.82	11.68	72.6	10.47
A_182	529.3	350.87	228.66	2.63	11.98	32.2	119.91	23.7	158.53	49.94	13.52	52.07	7.75	41.21	8.27	21.6	2.81	19.75	3.21	18.44	0.31283	0.25181	0.00384	256.939	9.24146
A_183	175.57	442.18	38.89	6.89	17.35	87.42	123.1	11.57	41.4	7.68	4.03	8.39	1.268	7.3	1.412	3.29	0.488	2.2	0.376	14.2167	0.246578	0.45997	0.00673	217.466	10.7965
A_184	234.71	3961.42	414	26.22	11.91	987.83	2090.53	269.15	1218.08	222.25	50.75	164.6	18.93	93.23	16.02	36.69	4.54	26.85	3.38
A_185	521.59	121.44	598.21	2.11	10.57	55.39	178.83	30.17	175.05	59.37	9.62	88.01	14.86	94.32	21.6	58.99	8.42	55.52	8.86	5.08595	0.0874302	0.65345	0.00865	312.344	29.8911
A_186	232.35	1156.02	604.83	5.94	1.12	14.43	45.73	8.16	48.48	18.84	7.39	34.8	8	67.61	22.1	69.67	8.44	37.89	3.53
A_187	49.23	1265.87	295.07	0.508	0.079	20.2	88.65	19.49	170.79	115.72	36.02	165.41	22.1	94.73	13.45	24.6	2.74	11.74	1.31
A_188	339.98	189.3	484.62	14.4	20.26	542.2	1414.32	182.58	815.3	169.28	9.79	139.9	18.39	92.07	18.01	43.69	5.28	33.75	4.51	23.1481	0.380444	0.2394	0.00288	209.151	7.11051
A_191	468.24	219.47	135.16	1.55	0.78	8.9	31.18	6.7	46.63	21.27	7.78	33.85	5.25	26.54	4.58	11.28	1.74	8.86	1.37
A_192	153.96	2839.5	375.5	0.225	0.123	9.15	32.86	7	54.73	28.54	8.93	71.5	12.81	76.86	14.65	28.9	2.73	12.76	1.58
A_193	1078.07	73.05	768.46	0.0001	0.434	4.49	13.21	2.6	18.95	13.71	3.15	37.53	9.71	90.4	23.65	74.92	10.78	67.79	9.18
A_194	503	596.79	92.84	52.63	27.13	494.56	961.76	98.97	377	47.93	10.52	36.74	3.83	17.81	3.53	8.25	1.061	6.96	1.179	13.4246	0.227078	0.34616	0.00482	297.501	11.5073
A_195	2054.37	355.05	1110.37	19.33	25.28	702.9	1605.74	205.22	905.67	202.92	6.06	181.46	29.93	193.19	40.14	111.3	15.63	98.47	14.1	8.72829	0.14551	0.53581	0.00647	286.911	15.5449
A_196	203.58	1236.91	49.9	4.25	5.88	75.56	181.02	20.43	88.34	12.33	3.07	10.25	1.073	6.02	1.41	3.45	0.509	3.74	0.723
A_198	538.09	1250.09	171.76	71.72	24.71	1129.72	2270.72	247.17	935.03	107.72	24.18	66.5	6.61	29.14	5.52	12.84	1.83	12.42	2.07	12.1936	0.205185	0.46611	0.00598	249.886	11.6368
A_199	2296.08	261.15	1748.96	2.3	28.16	314.17	974.68	157.08	860.16	290.03	12.22	334.22	59.6	361	71.08	174.21	21.59	129.08	15.47	3.6884	0.0608113	0.63052	0.00695	494.413	34.6311
A_200	735.17	280.34	55.92	2.19	5.34	0.638	2.04	0.4	3.93	1.8	0.533	4.44	1.06	6.55	2.02	6.37	1.06	5.69	1.11	9.64692	0.168444	0.55045	0.008	246.77	16.0711
A_201	322.76	463.4	57.51	1.02	2.59	10.64	26.38	5.14	26.28	11.49	2.83	13.42	1.88	10.74	2.19	5.17	0.612	3.99	0.594
A_202	417.33	527.14	499.99	24.58	13.85	325.51	803	112.19	566.96	138.78	36.12	138.69	19.13	100.83	19.79	48.42	5.33	30.4	4.22	10.1968	0.180916	0.46204	0.00737	302.605	15.7302
A_203	80.64	705.49	491.93	0.048	0.037	1.68	9.59	2.96	33.41	33.65	20.16	111.07	22.53	132.34	21.03	39.5	3.91	18.07	1.49
A_204	526.65	265.15	1118.11	41.16	21.37	911.8	2230.76	297.78	1428.05	300.51	30.38	281.58	40.35	215.9	42.25	102.49	12.38	71.65	9	13.7665	0.240687	0.36345	0.00572	280.239	11.7641
A_205	250.31	2323.08	102.29	20.98	8.16	320.14	815.76	104.13	483.52	70.08	17.96	50.46	4.93	21.21	3.78	8.86	1.012	5.51	1.073	8.82924	0.150454	0.58105	0.00757	242.123	16.4477
A_208	658.61	775.68	36	2	0.45	6.88	23.94	4.26	28.83	9.46	3.04	10.89	1.39	8.4	1.66	4.32	0.54	2.47	0.438
A_209	81.74	190.52	10.83	1.17	0.093	2.34	7.26	1.41	8.41	3.12	0.75	3.8	0.55	2.91	0.49	1.19	0.158	1.99	0.186
A_210	241.39	910.53	37.38	0.81	1.76	29.03	92.41	13.31	64.86	10.78	3.34	12.42	1.34	5.98	1.34	3.26	0.318	2.55	0.431
A_211	504.72	907.57	137.8	54.27	13.83	803.96	1661.84	177.78	662.94	78.42	18.63	51.86	5.26	24.01	4.59	10.63	1.323	9.99	1.55	7.89702	0.134704	0.60171	0.00791	250.311	18.6659
A_212	377.38	415.1	220.51	47.6	50.01	127.6	325.84	47.5	280.73	69.45	11.2	69.92	8.83	44.72	9.3	22.04	2.67	16.68	2.92	14.5836	0.244585	0.27374	0.00369	312.725	11.1118
A_214	238.67	499.49	90.58	15.36	24.59	76.35	191.63	24.54	111.49	20.26	8	20.15	2.91	15	3.32	9.95	1.2	8.72	1.48	12.273	0.209369	0.37378	0.00525	307.792	12.4575
A_215	169.85	2838.54	539.2	22.16	1.04	26.06	90.05	17.82	132.48	61.39	18.17	123	23.18	130.49	23.27	42.16	3.63	18.89	1.86
A_216	1346.72	216.31	607.66	0.581	64.69	175.12	669.45	126.55	764.08	299.86	6.93	314.07	39.26	167.15	23.2	45.83	4.96	29.83	3.87	23.7304	0.399824	0.19104	0.00275	220.116	7.57316
A_217	369.35	574.14	109.6	16.94	8.59	265.52	530.02	56.45	233.15	37.27	9.96	33.16	3.98	20.14	4.29	10.09	1.32	7.96	1.58	8.74355	0.154428	0.55035	0.00837	273.004	18.2659
A_218	327.43	452.27	779.69	3.53	24.04	118.89	381.67	68.22	435.08	166.53	20.89	186.61	28.03	148.53	27.99	68.78	8.54	54.25	6.69	13.8812	0.235078	0.45732	0.00607	224.292	10.4546
A_219	428.22	1246.1	439.63	8.45	1.16	318.22	711.97	90.49	426.35	98.03	15.39	93.34	14.3	79.62	16.17	40.21	4.38	23.11	3.05
A_220	1878.83	230.59	1695.91	1.27	6.67	233.21	882.71	152.8	840.88	282.72	25.14	289.55	51.31	320.6	62.19	143.39	17.47	93.87	10.92
A_221																				1.28449	0.0234782	0.62646	0.00895	1763.56	111.677
A_222	635.55	438.57	311.27	28.49	13.59	316.29	823.64	105.75	467.73	80.24	23.07	65.97	8.62	45.2	9.93	28.7	4.08	33.35	6.12	7.65521	0.130683	0.5558	0.00743	307.211	18.9805
A_225	605.78	411.68	370.37	16.28	40.19	199.67	616.36	98.65	516.79	116.99	14.04	103.7	13.78	67.68	13.9	33.62	4.52	26.9	3.69	12.9182	0.216945	0.33484	0.0043	316.019	11.7788
A_226	253.53	624.26	134.98	14.82	8.65	244.31	491.81	61.18	291.41	60.18	8.13	45.56	5.82	28.95	4.7	13.37	1.57	9.43	1.73	7.89391	0.140829	0.52486	0.00835	329.153	20.5396
A_228	194.93	1064.98	471.3	0.23	0.123	4.16	16.26	4.08	34.84	35.86	19.16	100.25	20.29	132.05	20.76	34.02	2.55	9.19	0.65
A_229	1611.05	241.91	1046.97	0.335	20.97	70.96	285.95	55.45	336.98	139.32	10.91	181.6	35.4	211.6	38.68	92.16	10.04	58.99	6.44	11.6836	0.1993	0.38207	0.00528	317.793	12.9514
A_230	460.88	363.04	863.56	89.15	39.29	723.94	1766.35	235.95	1167.44	245.65	23.08	231.57	31.1	169.14	32.15	78.58	9.69	53.15	6.77	18.5151	0.315384	0.18216	0.00292	285.294	9.90671
A_231	603.38	927.55	610.68	12.7	5.64	544.06	1285.06	175.79	878.5	187.36	36.1	170.6	23.37	124.97	24.36	56.84	6.86	41.06	5.05	9.41797	0.176509	0.4838	0.00912	309.629	19.1811
A_232	382.99	477.14	591.66	279.85	88.29	1487.32	3094.37	345.3	1441.71	234.55	42.75	180.5	23.6	119.32	22.48	54.65	6.78	43.04	6.75	12.1521	0.202314	0.10602	0.00154	479.923	15.7461
A_233	730.2	479.2	658.6	7.68	7.58	109.49	362.2	62.76	355.69	105.17	19.99	110.22	16	93.41	20.47	54.27	7.52	45.43	6.79	5.29633	0.0906051	0.70046	0.00904
A_234	300.25	360.24	942.22	36.11	26.21	537.56	1442.92	208.07	1062.51	241.64	34.51	239.9	34.19	195.89	36.06	85.73	10.82	60.76	8.14	15.9591	0.27507	0.28245	0.00434	281.632	10.5287
A_235	317.49	663.66	187.69	1.02	0.142	4.09	14.14	3.47	30.28	12.96	4.25	23.35	4.32	28.9	6.34	17.56	2.6	14.03	1.83	0.0395893	0.0040352	0.85767	0.01138
7222/6-1S 1958.8, Kobbe formation, Loppa High
A_004	161.98	1599.12	159.59	37.42	4.73	1075.95	2095.77	248.03	1089.66	149	24.24	87.73	8.17	35.94	6.38	14.68	1.761	10.58	1.581
A_005	619.18	299.79	325.63	26.9	11.82	193.09	579.81	88.78	491.84	111.05	48.17	109.6	13.56	68.52	13.01	29.69	3.21	21.2	2.78	11.3973	0.198745	0.43139	0.00678	291.721	13.8862
A_006	2925.53	363.1	1553.19	6.21	49.48	184.6	609.97	102.4	582.59	249.53	37.35	329.01	62.42	372.37	69.92	165.73	21.43	133.31	15.55	10.563	0.172945	0.26472	0.00324	437.479	14.8615
A_007	476.31	227.12	391.54	46.19	25.07	636.96	1077.14	114	497.21	90.89	19	91.68	11.49	68.42	14.35	39.56	5.05	34.76	5.98	12.2354	0.206593	0.38371	0.00534	302.362	12.3125
A_008	500.17	516.55	243.82	24.86	7.44	609.36	1483.93	179.97	740.53	117.61	29.05	86.25	10.35	50.41	9.31	21.29	2.53	16.49	2.37	6.62866	0.118636	0.59667	0.00948	306.462	25.4847
A_009	469.46	434.24	784.82	63.51	20.41	957.26	2306.38	303.98	1421.18	273.01	18.15	228.48	28.94	156.97	29.24	69.86	8.5	47.89	6.04	10.1297	0.170333	0.41988	0.00566	337.505	14.3866
A_010	175.25	3743.55	112.34	0.041	0.049	7.4	30.55	6.72	47.66	16.27	5.7	19.35	2.31	12.25	3.33	10.73	1.216	7.28	1.008
A_011	652.11	260.98	438.03	160.45	195.69	1124.72	2530.32	274.03	1093.49	159.29	44.16	133.46	14.82	75.65	14.83	38.69	4.84	35.88	6.62	18.4604	0.299892	0.15948	0.00189	295.679	9.61106
A_012	526.88	616.5	480.79	4.85	3.12	266.07	669.46	96.72	522.82	122.05	29.19	120.79	17.3	88.97	17.55	41.32	4.23	27.4	3.3	9.10498	0.188185	0.55932	0.01302	253.942	25.0043
A_013	172.29	692.34	656.33	9.39	2.78	671.96	1578.93	211.12	999.37	216.34	40.41	191.19	26.01	135.74	25.63	60.94	7.17	41.41	5.32
A_014	572.21	357.44	121.77	37.3	22.68	89.52	321.69	45.06	214.98	48.58	18.6	46.56	5.97	28.69	4.56	10.32	1.219	7.82	1.187	6.45578	0.106277	0.45699	0.00549	487.593	20.7952
A_015	658.02	324.5	940.54	67.88	7.69	660.97	1827.81	271.38	1416.41	312.65	69.86	292.35	39.67	204.03	38.06	88.27	9.84	56.47	7.16	7.96749	0.146006	0.54437	0.0095	306.385	22.0622
A_016	17.09	254.23	105.13	2.37	0.243	18.83	68.6	14.39	116.92	52.19	10.66	59.96	7.04	30.88	3.63	6.23	0.563	1.98	0.287
A_017	1797.11	503.78	567.06	13.01	10.86	423.88	1109.24	153.54	745.47	148.76	17.68	131.56	18.6	102.35	20.91	57.91	7.99	50.56	7.37
A_018	497.55	481.93	291.86	36.52	6.51	230.17	534.86	72.02	341.38	83.16	21.23	73.89	12.04	62.13	10.76	26.12	2.88	17.38	2.8	12.0729	0.231751	0.37391	0.00834	312.82	16.064
A_021	199.13	674.57	22.77	5.39	7.92	13.14	42.08	6.91	42.75	9.89	5.59	8.38	0.728	3.85	0.764	1.83	0.317	1.65	0.233	8.55432	0.150743	0.59218	0.00903	239.544	19.2128
A_022																				9.55019	0.168731	0.5166	0.00813	277.847	16.8619
A_023	441.38	379.62	821.15	227.21	28.33	887.71	2225.64	312.17	1456.76	328.85	88.56	287.61	40.01	204.36	33.23	68.27	6.28	32.14	3.5	9.19879	0.154004	0.18393	0.00284	567.725	19.1119
A_024	275.38	674.7	111.46	0.96	0.092	3.1	8.06	1.38	8.96	3.99	1.56	13.01	2.07	15.32	2.97	7.8	1.04	6.06	0.98
A_025	569.97	406.1	997.17	4.51	1.55	687.51	1662.76	233.76	1150.68	250.53	31.92	242.4	34.03	189.79	36.26	86.4	10.19	62	7.6	2.87737	0.0529871	0.68015	0.01084	503.157	61.4736
A_026	323.8	588.45	764.93	35.73	11.67	740.03	1727.02	231.6	1107.71	235.67	41.06	207.99	28.68	157.49	29.13	70.33	8.27	47.73	6.13	12.4875	0.219873	0.37303	0.00626	302.962	13.2239
A_027	533.04	417.88	1120.43	43.93	8.01	491.23	1840.86	300.98	1683.23	370.94	77.91	344.06	45.35	228.17	43.01	92.95	11	71.33	9.09	7.08667	0.132081	0.56423	0.01016	323.06	25.7325
A_028																				3.63478	0.059188	0.62028	0.0067	525.783	34.3473
A_029	523.95	962.98	609.49	38.33	3.38	399.11	1132.58	176.48	919.61	213.79	60.04	195.79	26.49	134.68	24.25	52.69	5.44	29.92	3.37	8.59254	0.17129	0.56639	0.01208	262.836	24.6945
A_030	717.7	692.82	720.87	4.75	1.84	368.05	982.64	149.75	827.84	198.75	51.98	210.05	27.61	154.63	29.3	66.8	6.69	41.57	5.74	4.61467	0.0971062	0.67983	0.01471	298.426	52.016
A_031	144.07	7947.4	154.08	67.87	25.43	1229.6	2165.21	227.04	902.28	107.69	34.1	77.27	6.37	28.63	4.62	11.29	1.36	9.3	1.34
A_032	371.88	386.64	1660.9	110.62	27.08	897.2	2382.88	342.48	1704.88	398.25	44.85	392.33	59.24	334.65	64.53	148.25	18.05	96.45	11.57	13.7193	0.229628	0.32144	0.00444	305.228	11.352
A_033																				8.52442	0.152598	0.53235	0.00872	297.2	19.5325
A_034	386.95	309.59	362.84	10.82	20.06	35.52	176.15	39.13	273.46	78.67	22.55	85.4	11.99	64.23	13.25	34.59	4.34	30.39	4.75	16.518	0.283758	0.29005	0.00465	268.535	10.1706
A_035	840.27	215.94	352.32	8.97	10.93	90.47	270.32	42.46	230.44	69.01	14.32	69.07	10.33	61.41	12.68	33.06	4.27	29.65	4.26	4.28835	0.0713529	0.68815	0.00814	306.616	33.2809
A_038	522.32	548.24	250.25	6.8	0.99	47.61	129.48	20.1	105.57	29.76	7.92	33.85	5.26	37	8.15	22.16	2.02	14.31	1.43
A_039	392.89	1059.97	102.1	0.105	0.071	3.44	9.06	1.43	9.65	4.34	1.72	9.14	1.77	14.98	3.59	11.46	1.51	9.12	1.45
A_040	148.45	587.94	208.14	11.95	1.75	28.55	75.88	11.52	57.43	19.6	5.9	27.03	4.56	28.47	7.09	15.74	2.3	9.47	1.13
A_041	504.8	298.92	447.01	11.83	5.63	121.38	418.46	71.63	437.97	114.82	35.26	122.88	16.46	89.61	17.35	40.77	4.5	28.56	4.13	11.8526	0.20932	0.43407	0.00711	278.639	13.7071
A_042	569.39	1011.91	263.95	75.17	34.38	1009.62	1826.67	199.95	816.85	138.11	26.71	98.67	11.22	52.68	9.58	23	2.7	17.36	2.24	11.1844	0.185135	0.32701	0.00418	370.399	13.4744
A_044	539.95	413.95	168.74	7.55	22.28	88.46	238.91	34.93	180.57	39.11	11.26	40.78	4.76	24.06	4.92	14.18	2.23	16.23	3.2	7.07764	0.121726	0.60087	0.00834	281.414	21.583
A_045	508.96	682.57	166.49	17.87	7.58	245.54	678.75	92.05	412.65	70.79	23.98	53.29	5.68	25.36	5.21	13.4	1.85	13.33	2.17	3.8613	0.0650061	0.71482	0.00882
A_046	499.35	495.39	579.58	35.94	9.67	263.85	798.77	126.25	690.38	169.13	39.37	172.19	23.15	122.39	23.1	51.21	5.82	34.92	4.42	15.3775	0.279032	0.31326	0.00609	276.548	11.7361
A_047	521.04	345.08	1021.54	28.51	12.43	617.21	1877.55	285.02	1510.92	364.41	24.5	337.57	41.72	210.24	39.34	89.06	11.25	54.99	5.9	9.78282	0.169395	0.47131	0.00702	308.057	15.6645
A_048	654.07	248.43	1296.68	46.79	12.04	1046.2	2585.82	338.51	1576.34	298.86	32.6	279.44	38.68	225.99	48.38	130.24	17.16	115.24	17.19	3.1956	0.0589225	0.68843	0.01103	424.222	56.6723
A_049	304.06	372.74	717.16	149.53	67.32	403.41	1181.49	182.44	943.67	240.81	67.29	233.56	31.68	167.33	28.33	53.95	6.51	34.18	5	15.8983	0.260337	0.23335	0.00287	306.795	10.3244
A_050	492.76	425.91	402.48	71.39	19.81	998.49	1898.2	208.66	824.39	129.62	30.06	110.93	14.97	76.1	14.31	38.32	4.83	30.61	4.09	11.1074	0.188763	0.42035	0.00595	307.247	13.474
A_051	592.22	647.66	543.85	11.53	3.67	229.52	691.64	113.84	660.06	165.59	43.52	164.4	21.34	115.03	21.31	49.97	5.84	36.13	4.34	8.63111	0.167616	0.54218	0.01094	284.282	22.9394
A_052	328.6	422.1	758.21	24.11	6.06	311.67	940.45	153.26	820.38	210.14	42.79	215.55	29.84	166.59	30.18	71.58	7.93	41.93	5.25	15.058	0.294765	0.34251	0.00816	267.141	13.4171
A_055	862.14	555.79	471.81	11.14	2.88	390.52	979.76	139.91	691.34	147.99	21.27	133.91	17.63	96.18	19.65	43	5.66	32.21	3.99	6.3004	0.120673	0.54825	0.01058	385.345	30.0576
A_056	700.2	382.64	1283.59	143.94	5.66	394.55	1360.65	238.85	1375.33	374.65	73.99	379.26	52.83	279.98	48.53	104.67	10.84	58.51	7.69	8.41326	0.175542	0.53268	0.0126	300.907	26.6538
A_057	330.74	270.77	736.73	57.39	23.11	1206.02	2706.83	322.21	1346.65	240.52	27.47	218.51	28.54	153.16	28.93	67.93	8.24	48.4	6.73	13.6893	0.232371	0.37961	0.00543	272.521	11.1879
A_059	114.44	1011.52	133.02	5.65	0.45	46.59	129.02	20.15	108.53	26.11	8.66	28.25	4.43	24.24	4.83	11.84	1.19	10.23	1.28
A_060	1208.37	361.31	250.35	81.45	52.72	684.9	1308.63	144.75	612.28	99.04	22.57	83.05	9.7	48.51	9.96	23.85	3.11	21.48	3.46
A_061	191.86	662.76	91.51	5.85	1.99	237.37	433.89	44.84	177.84	26.49	4.07	25.61	3.32	15.91	3.27	8.65	1.03	6.34	1
A_062	109.37	1175.26	356.37	2.83	0.0001	10.35	30.6	5.33	27.76	13.41	4.65	38.21	6.93	45.2	11.61	31.76	2.82	17.41	2.14
A_063	473.54	592.95	233.74	26.29	21.95	135.75	578.1	100.47	532.88	112.84	25.23	81.55	9.26	42.58	7.64	20.12	2.59	18.82	2.87	10.7875	0.180373	0.50099	0.00624	257.042	12.8482
A_065	254.79	802.49	249.92	37.84	15.54	592.78	1287.99	157.78	723.2	129.85	26.56	102.25	12.96	60.27	9.2	21.05	2.15	9.1	1.6	8.73439	0.147239	0.5566	0.00714	267.52	16.2327
A_067	790.4	772.64	369.54	34.61	16.94	575.85	1463.4	196.96	882.26	164.98	29.41	119.85	13.93	73.07	13.45	29.68	3.65	22.05	2.66	6.39632	0.107192	0.62624	0.00764	280.155	21.9943
A_069	251.31	1885.97	110.55	1.91	0.76	8.75	32.38	7.91	64.47	32.62	7.82	36.5	4.15	24.25	4.77	9.61	1.09	6.95	0.67	3.2257	0.0629512	0.7978	0.01399
A_073	236.35	4141.85	134.93	13.3	2.72	597.16	918.78	93.04	368.69	60.35	15.52	46.58	5.58	27.68	4.72	11.69	1.508	8.2	1.187	4.88735	0.0926783	0.63094	0.01126	364.321	38.925
A_074	82.74	717.34	45.11	0.55	0.038	4.96	13.34	1.9	10.05	3.39	1.2	4.48	0.99	5.55	1.35	4.76	0.447	2.52	0.203
A_076	425.51	427.62	650.21	19.75	16.97	714.74	1633.14	213.63	1007.13	199.79	27.66	186.31	24.62	128.1	25.04	60.93	7.4	45.73	5.88	15.7307	0.264776	0.27701	0.00383	288.408	10.3545
A_077	1640.23	935.64	313.71	49.44	10.97	337.83	780.67	103.04	506.88	116.44	34.47	101.71	13.85	66.65	11.78	24.57	2.73	15.16	1.88	5.11902	0.0888327	0.55556	0.00786	466.822	29.0332
A_079	754.83	1675.55	813.82	4.07	3.44	33.96	104.94	17.66	110.12	41.41	11.78	75.44	15.31	105.91	24.83	71.2	9.73	62.14	6.28
A_080	207.32	1401.76	690.92	6.88	1.19	135.28	333.27	49.07	285.85	114.86	31.24	210.39	31.58	155.54	25.91	47.27	4.6	22.98	2.35
A_081	503.75	712.22	637.27	40.38	10.84	781.72	1748.77	228.8	1069.6	216.9	39.95	199.49	25.21	133.25	24.66	55.41	6.48	38.61	4.24	6.57073	0.113117	0.54268	0.00751	375.752	22.3945
A_082	381.62	633.85	772.68	58.14	4.62	642.09	1626.02	224.59	1095.56	236.69	48.22	224.56	29.14	150.46	27.9	60.25	6.56	39.63	4.46
A_083	30.06	1024.94	219.96	0.308	0.0001	0.315	2.9	1.501	21.07	69.02	38.99	196.67	24.72	87.17	10.8	18.83	1.7	9.47	1.006
A_084	247.53	2408	236.62	5.69	6.6	29.38	158.5	36.03	244.6	79.14	24.99	70.55	9.09	42.94	8.02	18.4	2.53	18.37	2.69
A_085	657.89	415.75	66.93	47.84	19.25	921.53	891	59.37	186.68	21.25	8.11	19.98	2.22	10.25	2.23	5.77	0.737	5.49	1.144	14.4279	0.243553	0.35766	0.00481	270.54	10.5407
A_089	414.63	596.64	3874.36	161.3	27.47	552.72	1796.45	314.47	1841.42	653.29	56.05	740.38	122.84	703.08	140.17	362.16	51.03	351.53	57.28	8.296	0.138336	0.39012	0.00488	440.728	17.2153
A_090	237.74	738.84	242.41	27.86	0.82	82.34	238.92	37.66	194.55	48.79	13.55	47.94	7.39	43.55	8.18	23.5	3.19	18.15	2.02
A_091	297.4	303.28	336.55	12.73	13.44	580.33	1472.46	183.46	790.39	137.44	27.7	111.15	14.47	70.18	12.75	31.83	3.71	21.83	3.27	17.1999	0.298794	0.24992	0.00439	276.214	10.3054
A_093	1804	459.08	269.52	24.13	1.77	74.45	217.25	35.18	189.39	64.12	16.73	72.12	11.55	64.19	10.94	22.96	2.73	14.88	1.71
A_094	462.09	365.97	239.74	68.35	47.41	411.56	1153.08	143.18	599.13	99.15	23.81	78.77	10.55	50.65	9.14	21.88	2.75	18.23	2.43	5.88963	0.0964319	0.46616	0.00518	523.395	21.9339
A_095	504.32	313.12	189.23	37.67	30.03	391.87	923.02	105.64	439.73	68.12	17.32	58.68	7.14	37.02	6.95	17.14	2.22	13.06	2.01	18.6846	0.314203	0.14192	0.00221	299.46	10.0987
A_096	422	841.29	302.91	2.05	0.822	258.9	619.15	87.15	443.43	93.66	25.57	94.91	11.32	58.61	11.16	25.56	2.73	17.25	2.16
A_097	3249.39	420.16	497.63	61.15	20.23	480.95	1380.49	182.47	820.77	152.61	19.34	124.42	17.99	93.95	17.97	42.9	5.35	31.69	4.16	16.0927	0.274513	0.28794	0.00445	276.633	10.3218
A_098	307.98	2010.49	94.36	0.81	0.178	5.17	19.45	4.43	34.43	14.35	3.59	20.49	2.81	14.44	3.25	8.24	0.66	5.99	0.89
A_099	735.5	784.4	634.3	20.6	12.13	794.32	1837.62	255.91	1270.24	268.96	26.49	212.41	25.76	130.04	23.79	57.59	7.17	44.01	5.83	10.9206	0.190815	0.35181	0.00561	361.703	14.8612
A_102	87.14	973.7	372.03	2.91	0.084	34.98	118.71	19.91	138.59	76.15	25.12	125.3	16.85	78.9	13.32	28.8	2.89	13.5	1.56
A_103	548.65	869.18	110.27	4.43	8.01	90.32	280.47	42.14	205.71	38.36	9.24	31.95	3.77	18.89	3.79	8.03	1.127	6.14	1.049
A_106	661.26	49.31	1056.14	3.61	16.69	169.43	597.61	104.79	580.78	282.05	5.3	311.01	48.25	231.27	36.43	75.69	8.12	43.87	4.7	13.9958	0.260524	0.15994	0.00416	388.451	14.9101
A_108	395.61	1007.78	123.28	22.41	21.31	216.44	527.37	65.23	291.63	48.42	12.76	35.72	3.85	20.68	3.88	10.49	1.45	8.34	1.44	8.02439	0.135221	0.61383	0.00758	233.834	17.689
A_109	442.24	434.7	169.13	4.13	9.92	249.29	686.66	93.95	450.75	80.93	14.18	63.29	7.06	36.48	6.5	16.41	1.92	11.22	1.55	12.7763	0.225262	0.366	0.00609	300.423	12.9333
A_110	335.69	578.87	692.02	36.99	5.33	391.91	1142.26	180.16	922.79	218.52	58.69	207.11	28.56	154.76	27.84	61.6	6.48	35.7	4.77	7.15768	0.135766	0.59589	0.01095	283.826	26.7213
A_111	93.49	639.76	803.86	99.72	2.76	349	964.02	149.92	772.31	217.93	62.45	226.81	33.75	182.71	30.77	60.52	6.42	27.15	2.71	5.29773	0.0993535	0.6809	0.01167	255.48	36.9294
A_112	782.38	2294.13	194.09	12.86	0.98	169.42	412.12	61.58	337.73	83.29	22.46	77.01	9.52	44.52	7.66	15.83	1.75	8.97	1.23	4.76168	0.111327	0.65649	0.01703	329.832	57.9584
7222/6-1S 1638, Snadd Formation, Loppa High
A_004	672.16	160.98	157.99	53.2	26.65	1501	2055.43	175.7	622.69	78.88	7.63	59.9	5.99	29.96	5.52	13.32	1.66	11.07	2.04	8.16927	0.12947	0.5993	0.0071	244.094	16.5371
A_005	480.18	620.31	42.46	1.434	1.35	8.8	32.19	6.67	41.2	13.57	4.04	10.8	1.467	7.45	1.484	3.54	0.458	2.75	0.405
A_006	668.63	415.42	389.19	30.75	16.47	1068.72	2329.2	281.18	1152.24	188.37	22.39	129.37	16.27	77.62	14.13	33.7	4.04	26.2	3.35	11.3353	0.182454	0.46849	0.00614	267.348	12.3395
A_007	491.13	1053.82	516.51	75.61	10.2	1562.08	3246.64	401.88	1781.74	311.95	36.57	221.37	25.59	117.14	19.13	41.24	4.41	25.71	3.1
A_008	772.87	1384.34	448.95	0.043	0.182	16.32	63.96	13.08	91.82	27.66	22.4	38.38	7.57	61.43	14.58	41.67	6.27	40.02	4.2
A_009	471.39	715.13	1061.47	205.53	9.79	510.74	1464.61	224.16	1173.22	284.67	76.32	294.36	42.06	223.98	41.3	91.29	9.97	54.53	6.41	8.54847	0.146153	0.65178	0.00999	182.434	20.3313
A_010	580.4	464.56	159.99	68.95	23.57	739.82	1191.26	110.3	413.77	62.44	17.9	50.36	5.8	29.63	5.49	14.23	1.878	12.68	2.17	15.7828	0.259062	0.24489	0.00404	303.335	10.6243
A_011	1228.55	212.89	1552.65	72.28	59.75	806.27	2046.89	287.6	1463.74	374.05	22.72	374.78	52.59	281.16	55.05	137.84	17.42	113.37	15.93	18.5839	0.293557	0.16357	0.00237	292.026	9.3186
A_012	331.51	444.62	146.33	75.38	26.11	817.18	1510.07	149.82	556.27	73.45	14.99	52.13	5.68	26.45	5.04	11.7	1.522	10.2	1.482
A_013	235.19	2988.33	195.67	35.32	12.11	264.81	740.03	110.66	570.86	114.39	16.66	90.84	10.74	47.39	7.62	17.89	1.912	9.9	1.228	10.7078	0.174278	0.17176	0.00302	497.407	16.3966
A_014	364.24	337.51	448.33	137.56	80.57	396.89	1133.72	152.92	704.91	139.15	41.12	137.2	17.66	92.13	16.72	41.32	4.78	28.05	3.94	8.37802	0.130556	0.52487	0.00578	309.68	15.0018
A_015	215.3	568.38	179.26	48.55	15.24	118.51	335	49.95	256.26	58.05	15.24	50.47	7.07	37.76	6.74	15.74	1.78	11.73	1.5	9.5584	0.15349	0.54185	0.00681	256.368	14.3969
A_017	340.93	5003.14	347.45	94.84	8.37	687.95	1734.42	236.81	1078.63	190.19	45.92	130.11	16.43	79.53	13.66	28.58	2.85	14.81	1.73
A_018	117.51	762.1	564.25	30.56	2.79	57.99	175.54	26.24	131.83	39.84	12.56	58.31	12.63	103.62	23.11	50.84	5.01	23.64	2.27
A_021	582.62	270.96	125.46	23.64	12.86	310.5	491.35	44.83	173.49	26.34	6.94	29.72	3.52	20.2	4.58	11.94	1.467	11.88	2.01	19.6657	0.324861	0.44217	0.00646	164.122	7.66827
A_022	276.84	2982.87	383.63	97.93	29.96	1244.8	2407.01	287.62	1235.4	217.85	53.43	157.05	17.8	86.43	14.86	33.39	4.08	23.22	2.99	5.10126	0.0798902	0.69762	0.00764
A_023	183.36	4463.85	377.78	193.72	17.71	398.08	1232.45	190.21	983.43	197.31	50.01	147.48	18.33	88.99	14.51	30.66	3.23	14.41	1.817	11.2575	0.187561	0.56494	0.00809	200.35	13.643
A_024	326.18	190.14	73.18	45.09	2.19	28.71	94.55	15.89	84.61	21.46	6.5	20.86	3.21	16.91	2.85	6.21	0.676	4.33	0.731
A_025	2977.25	406.22	1184.97	145.44	80.53	154.8	601.04	109.08	626.15	226.42	50.17	249.11	43.75	256.44	48.81	116.4	14.36	86.97	10.07	26.8168	0.424294	0.11725	0.0017	216.624	6.85598
A_026	434.69	767.59	644.2	190.15	17.13	871.06	1943.63	257.25	1229.91	249.83	43.61	212.28	28.31	141.33	24.67	51.35	5.47	30.36	3.67	11.9403	0.199599	0.47066	0.00713	252.205	12.8228
A_027	710.03	641.72	588.8	56.42	16.15	1090.57	2729.21	368.61	1713.18	319.13	41.55	227	27.12	130.25	22.14	49.89	5.87	33.97	4.09	8.22301	0.133207	0.51525	0.00669	325.015	16.8896
A_029	88.22	1565.09	90.59	0.677	0.196	3.16	8.76	1.676	10.47	4.91	1.54	11.71	1.884	11.32	2.94	7.72	0.928	5.53	0.816
A_030	359.6	1905.02	432.53	161.92	29.07	1274.26	3458.69	467.75	2098.85	309.47	64.28	183.46	18.71	85.96	14.97	36.49	4.47	30	4.52	9.44733	0.150836	0.54564	0.00657	256.215	14.1897
A_032	547.88	2295.44	338.6	157.59	46.15	1070.51	2058.14	244.67	1059.92	185.2	41.91	131.67	15.56	75.36	12.98	29.74	3.51	22.28	2.89	9.44912	0.149107	0.54313	0.00618	258.308	13.6757
A_033	978.15	140.76	2797.14	152.87	150.5	444.08	1793.27	328.79	1932.99	678	94.05	650.84	96.76	527.81	102.73	265.89	36.59	254.15	37.48	17.0242	0.269535	0.21636	0.00271	294.422	9.54573
A_034	252.45	1291.58	242.7	254.01	57.09	1146.39	2106.28	210.54	807.85	118.89	34.74	92.95	11.1	54.72	9.19	18.76	1.834	10.78	1.582	15.4607	0.243815	0.3632	0.00437	249.624	9.09313
A_035	522.53	454.74	89	20.14	5.59	220.56	442.77	53.94	241.07	41.8	11.69	33.16	4.12	20.18	3.82	8.04	0.888	5.37	0.765	12.2324	0.210981	0.48622	0.00804	235.949	13.3793
A_038	761.65	170.6	600.84	53.78	41.17	1016.38	1914.14	211.74	868.91	150.36	18.69	131.43	18.13	101.69	21.29	56.09	8.02	52.89	8.27	17.5469	0.283263	0.18137	0.00279	301.229	9.91075
A_039	383.63	494.36	818.43	110.62	57.55	3741.53	6921.11	722.39	2683.82	415.09	10.38	289.82	34.65	162.5	27.75	62.22	7.65	43.02	5.27	12.9685	0.205182	0.42605	0.00495	259.401	10.3284
A_040	1256.62	323.69	1327.37	11.36	5.23	636.43	1745.49	267.81	1442.22	391.12	20.19	376.14	55.73	297.57	53.95	120.29	13.24	70.93	8.25	2.42542	0.0400609	0.70348	0.00898	527.383	61.2918
A_041	262.48	823.77	37.93	1.54	3.49	32.98	102.41	14.61	75.24	15.01	4.73	13.74	1.478	6.64	1.302	2.95	0.378	2.18	0.384
A_042																				11.1012	0.177462	0.53134	0.00637	227.701	12.0615
A_043																				19.7863	0.364093	0.17861	0.00514	268.526	10.5673
A_044	394.63	415.56	313.7	59.74	22.24	396.97	1022.96	131.57	596.7	112.03	23.57	95.54	11.79	61.52	11.47	27.69	3.6	23.95	3.4	8.45666	0.137309	0.57786	0.00742	256.178	16.7573
A_045	384.86	2985.65	541.62	173.76	24.97	2626.33	5543.08	685.76	2915.98	466.4	95.58	304.56	30.7	128.82	21.74	45.29	5.15	30.45	3.64	7.76156	0.124701	0.64545	0.00778	208.489	18.246
A_046	352.28	641.21	608.45	476.02	104.38	1044.68	2381.98	301.71	1347.39	266.94	68.87	224.95	28.74	141.6	23.96	48.13	5.14	28.34	3.88	20.1207	0.315778	0.21239	0.00239	250.97	8.02427
A_047	2675.15	27.36	3241.17	11.53	5.6	102.54	259.28	40	252.2	179.3	9.04	398.32	88.87	594.03	125.55	321.35	42.38	274.77	36.17
A_048	957.04	164.51	2912.22	72.88	46.7	146.04	486.17	82.44	484.72	222.88	57.38	331.67	61.35	392.72	93.02	275.2	41.75	324.59	58.16	7.94281	0.129962	0.61405	0.00803	236.097	18.5137
A_049	935.14	526.2	684.06	10.72	4.73	392.95	1026.46	151.82	809.39	201.96	26.91	187.83	25.44	135.54	26.84	66.14	7.93	47.69	6.24	11.7055	0.22471	0.38337	0.00905	316.325	17.0365
A_050	397.13	2195.88	132.57	40.39	12.78	732.41	1511.92	169.26	682.05	87.67	21.49	62.51	6.4	28.54	4.7	10.6	1.245	7.25	0.948	7.27326	0.117439	0.63725	0.00787	232.451	19.6589
A_051	822.44	398.96	392.45	30.13	30.32	1776.27	3025.53	317.66	1211.14	181.7	11.31	150.79	16.24	80.29	15.31	37.06	4.51	27.97	3.8	11.409	0.184835	0.51535	0.00653	232.734	12.1309
A_052	254.62	1910.73	824.45	525.5	34.6	1104.31	2960.81	407.41	1881.75	350.21	83.02	285.05	36.76	187.58	31.36	67.36	6.81	33.41	3.89	6.77002	0.109541	0.6671	0.00815	213.91	21.4851
A_055	581.79	303.73	453.37	14.35	8.33	333.83	986.4	149.87	778.28	172.88	19.25	145.36	17.32	86.13	16.16	41.41	5.53	38.7	6.14
A_056	436.71	227.36	223.69	28.45	12.28	494.16	1002.26	105.66	425.3	71.53	12.2	67.12	7.97	40.66	8.11	20.86	2.74	18.13	2.9	6.24298	0.102114	0.59921	0.00767	322.919	22.7377
A_057	21172.9	404.44	126.76	0.355	0.052	8.18	31.27	4.92	25.45	7.95	2.73	8.89	2.05	17.89	4.14	12.61	1.92	14.75	1.96
A_058	740.83	1190.52	273.64	21.81	9.3	212.88	559.38	79.45	394.23	89.49	21.19	78.05	9.98	50.31	9.89	22.99	3.04	18.24	2.58	5.83328	0.0966373	0.67234	0.00888	242.85	26.575
A_059	450.09	445.43	719.51	47.88	9.92	431.1	1180.84	176.31	935.13	226.15	45.73	223.58	28.99	154.66	28.66	64.84	7.32	41.32	5.64	14.1764	0.25724	0.33996	0.00714	285.161	12.9543
A_060	232.53	253.33	333.12	17.05	19.51	341.83	801.5	99.1	460.07	89.96	12.13	90.66	12.54	66.42	13.32	33.79	3.95	23.11	3.18	13.031	0.242824	0.373	0.00813	290.317	14.5303
A_062	86.26	362.32	69.33	11.58	0.553	13.91	53.26	8.81	46.73	12.3	3.47	12.03	1.757	10.69	2.56	7.27	0.946	5.47	0.809	25.2717	0.4279	0.61199	0.00917	73.0468	6.62337
A_063	372.47	296.34	395.7	26.58	45.14	51.39	220.28	45.46	302.73	88.3	26.12	88.8	12.95	70.5	14.01	37.45	4.83	33.49	4.95	19.1718	0.308748	0.19072	0.00282	272.129	8.96392
A_064	132.17	771.31	183.64	121.78	4.39	83.6	284.28	46.68	239.28	59.16	16.27	54.85	7.48	40.2	7.1	15.25	1.664	9.75	1.013
A_065	112.89	3921.06	124.23	18.89	11.09	97	492.14	99.88	606.4	117.08	25.08	78.7	6.98	27.44	4.37	9.64	1.089	6.06	1.041
A_066	349.58	420.16	287.95	9.63	61.93	113.87	351.93	54.4	285.26	70.93	10.32	68.34	9.52	53.63	10.2	26.03	3.42	21.55	2.96	16.9866	0.271231	0.36755	0.00446	225.152	8.35849
A_067	334.92	484.17	517.07	58.6	16.62	149.27	515.91	96.32	585.85	165.3	35.4	157.02	20.95	106.95	19.69	45.62	5.34	32.03	4.64	6.1885	0.101106	0.32589	0.00452	670.437	23.9994
A_068	428.06	736.89	109.52	33.55	14.59	241.46	595.15	75.99	341.75	55.61	16.31	43.2	4.32	20.1	3.88	8.86	0.928	6.03	0.956	8.95977	0.145302	0.57926	0.00723	240.119	15.5585
A_069	112.44	327.88	109.92	71.81	22.76	2753.33	2834.91	197.94	569.2	53.31	10.6	47.04	4	17.36	3.31	8.7	1.269	8.73	1.422	15.2138	0.254604	0.37523	0.00572	247.431	10.219
A_072	465.72	303.36	164.77	69.48	25.62	2203.75	3159.13	256.65	818.4	86.63	12.59	69.34	6.61	29.47	5.5	13.74	1.924	13.29	2.28	11.0181	0.179669	0.50726	0.00667	247.021	12.8181
A_073	414.96	392.63	408.79	54.8	3.79	55.42	174.76	27.01	149.5	51.58	14.64	80.17	13.16	81.15	17.65	43.07	4.8	25.49	3.6	22.2965	0.392737	0.54006	0.00916	109.199	7.83211
A_074	1653.63	501.38	253.88	33.65	2.91	402.45	1009.92	133.61	616.84	109.63	22.83	90.45	11.03	53.05	9.82	22.21	2.67	14.8	1.99	7.99105	0.171136	0.61507	0.01519	233.573	31.8733
A_075	773.95	256.66	1279.55	27.59	12.39	156.23	600.47	110.58	681.3	251.02	29.16	298.87	50.1	275.75	50.41	120.73	14.7	91.15	11.94	7.67519	0.124886	0.3724	0.0049	494.395	18.6789
A_076	459	519.28	858.52	163.56	26.11	124.07	479.87	88.14	546.12	211.09	50.88	239.25	37	194.53	33.22	71.57	7.64	40.27	4.6	9.73141	0.157203	0.52169	0.00651	268.378	14.0439
A_077	149.44	129.82	217.96	59.97	10.23	109.28	235.39	32.61	169.13	49.06	9.03	58.01	8.09	44.15	8.69	20.29	2.24	12.65	2.11	14.9388	0.265568	0.42922	0.00779	223.308	11.5257
A_078	308.4	575.3	205.55	27.3	14.39	361.36	1073.72	152.72	715.42	119	16.53	87.87	9.84	44.31	7.99	18.09	2.36	15.03	2.2	14.8017	0.254143	0.34471	0.00591	270.596	11.1893
A_079	423.21	546.95	912.04	53.45	11.96	76.17	230.15	39.88	253.83	122.83	22.72	197.27	32.36	184.75	33.94	72.97	8.28	47.36	5.26	14.0964	0.230502	0.52948	0.00685	179.711	10.0481
A_080	450.54	1674.41	350.55	21.06	3.45	815.68	1726.12	219.81	1018.54	186.5	46.46	153.13	17.82	82.69	13.9	28.8	3.19	16.81	1.97	12.0482	0.249673	0.3883	0.01059	304.08	18.536
A_081	2695.33	264.86	2097.54	1.293	136.6	230.15	730.89	113.24	588.08	239.67	8.9	328.03	69.12	435.62	80.92	183.98	20.93	109.15	12.27	17.9727	0.284255	0.34183	0.00386	224.133	7.89198
A_082	696.57	1598.14	931.08	65.52	25.98	263.2	968.98	174.81	1022.37	266.54	90.63	218.58	30.92	168.96	33.55	83.5	11.64	82.19	12.56	13.678	0.224506	0.48786	0.00652	209.78	10.4696
A_083	900.43	253.87	1009.06	7.22	8.84	24.5	79.15	14.25	87.01	42.94	16.01	81.51	17.64	133.84	32.54	97.83	14.04	94.69	11.61	7.94976	0.135877	0.62995	0.00926	219.444	20.627
A_084	680.96	1477.33	157.99	81.04	13.44	2763.06	3891.87	334.82	1138.12	115.15	23.57	84.56	6.96	28.93	5.42	13.47	1.512	10.1	1.589	7.70119	0.127513	0.61506	0.00813	242.712	19.2789
A_085	405.58	169.59	102.12	2.22	0.547	3.52	11.8	2.24	16.85	7.72	2.64	14.82	2.36	15.09	3.81	10.77	1.489	11.41	1.99
A_086	297.91	354.96	384.04	36.08	22.37	174.71	626.35	103.74	571.44	128.89	18.24	110.84	13.61	70.94	14.07	36.45	4.51	30.94	4.85	7.65287	0.124161	0.56229	0.00691	300.459	17.803
A_089	238.33	545.3	258.13	73.81	65.32	206.6	540.59	74.35	378.28	78.65	19.17	73.12	8.83	45.63	8.95	22.59	2.94	19.3	3.44	16.276	0.259611	0.33579	0.00403	250.414	8.90184
A_090	653.49	186.23	129.92	15.99	4.07	81.1	222.95	32.29	173.83	37.28	7.69	39.49	4.89	24.76	4.94	10.85	1.358	8.24	1.115	7.3416	0.123968	0.56983	0.00815	305.303	20.7456
A_091	434.78	488.57	1290.16	44.59	3.42	1026.09	2304.62	306.95	1447.12	310.11	36.6	291.99	42.23	231.66	44.78	108.09	13.24	75.05	9.54	3.51778	0.0658339	0.70238	0.01221
A_092	300.99	1579.58	165.16	14.36	10.45	133.49	461.93	79.27	451.36	90.1	20.54	70.71	7.59	33.98	6.13	13.97	1.692	9.9	1.571	6.40656	0.105483	0.64193	0.00825	259.437	23.0465
A_093	485.25	478.23	671.58	81.04	126.66	1111.9	2745.57	364.4	1664.84	293.63	17.66	226.69	27.31	136.83	25.53	60.33	7.05	39.18	5.08	14.5645	0.231217	0.24159	0.00286	330.281	10.8034
A_094	262.07	394.55	88.65	0.321	0.71	0.134	0.546	0.117	0.81	0.47	0.308	2.78	0.682	7.07	2.62	9.57	1.464	8.73	1.292
A_095	455.86	5698.31	215.83	30.04	4.86	425.79	996.61	133.36	646.63	134.61	33.02	100.9	11.95	52.71	8.82	17.4	1.98	10.3	1.23
A_096	243.29	831.42	830.17	71.29	13.85	72.43	291.21	52	347.76	135.78	29.25	189.36	32	173.96	31.21	69.4	7.95	42.94	5.46
A_098																				10.2135	0.166904	0.61281	0.00774	183.108	14.1272
A_099																				4.33107	0.0722188	0.66369	0.00877	351.325	35.0133
A_100																				11.6822	0.192429	0.42055	0.00583	291.891	12.499
A_101	1545.67	492.31	961.95	129.17	24.07	887.77	2232.51	297.02	1386.95	297.38	51.05	247.63	38.62	199.25	35.03	82.1	10.91	72.53	9.35	5.41448	0.0908814	0.60236	0.00829	370.174	27.6172
A_102	391.36	433.11	630.65	51.37	91.41	277.02	1065.35	174.68	931.34	209.11	37.03	173.16	22.42	115.05	22.59	57.64	7.9	52.79	8.04	14.9745	0.237691	0.26015	0.00308	311.671	10.3103
A_103	240.02	251.73	507.84	232.38	15.78	312.6	865.31	128.19	618.46	141.49	37.9	133.22	20.06	106.27	19.49	41.99	4.27	21.65	2.56
A_106	929.56	195.59	3657.59	8.47	53.92	198.51	700.51	131.31	844.52	389.03	11.6	543.74	105.59	693.19	142.82	376	50.29	314.33	38.97	26.6809	0.498309	0.45254	0.00935	117.68	7.21629
A_107	1966.88	232.05	426.15	40.64	35.24	146.04	568.81	88.71	534.65	239.93	33.74	307.52	45.4	158.38	15.57	20.04	1.558	5.98	0.631	13.4626	0.217489	0.33573	0.00431	302.734	10.9686
A_108	506.08	3878.03	369.57	97.8	27.65	1252.09	2410.57	286.8	1237.65	216.62	50.95	159.51	17.81	80.94	13.76	31.09	3.73	21.29	2.69
A_109	190.24	2153.5	304.29	122.23	39.18	322.61	801.72	110.44	538.05	114.41	32.71	100.36	13.26	66.23	11.72	25.23	2.87	15.6	2.37	4.86736	0.0777073	0.6856	0.00764	271.651	27.9887
A_110	839.16	568.85	729.04	35.7	13.57	896.46	1882.34	237.53	1084.4	220.73	25.18	197.14	25.92	137.2	27.18	67.52	8.5	52.79	6.98	8.51426	0.136286	0.578	0.00662	254.26	15.4149
A_111	339.99	2082.07	208.81	30.82	10.06	1665.18	3233.92	360.27	1394.83	173.6	31.69	109.08	10.8	47.7	8.18	17.85	2.02	11.39	1.571	6.56858	0.113474	0.59525	0.00902	311.148	24.6278
A_112	615.79	471.69	1302.19	123.77	6.71	564.7	1520.55	230.56	1219.32	305.68	73.03	318.26	47.1	265.75	49.66	115.38	13.56	77.03	9.97	6.27904	0.106451	0.64169	0.00902	265.301	25.2619
A_113	1630.47	464.96	230.22	9.45	6.06	516.93	1097.54	130.07	542.76	89.61	14.81	67.01	7.98	43.14	8.01	21.25	2.89	18.38	2.67
A_114	362.76	406.33	289.71	42.16	16.1	36.11	132.18	24.97	155.19	60.37	14.61	65.66	9.65	50.85	9.93	25.71	3.12	20.68	3.44	9.03016	0.162272	0.40615	0.00759	390.857	19.0613
A_115	469.67	1319.89	226.37	59.14	51.85	303.34	846.71	122.55	602.37	114.95	26.08	81.34	9.62	48.51	8.38	20.36	2.69	16.41	2.35	14.4009	0.234347	0.43634	0.00554	227.76	9.74376
A_116	800.88	169.79	424.23	3.94	4.17	19.16	88.78	18.73	121.94	61.02	17.13	83.26	16.21	94.11	16.93	40.34	5.55	38.3	5.34	6.03755	0.0962334	0.67307	0.00742	233.12	22.2901
7324/10-1 1664.4, Kobbe Formation, Bjarmeland Platform
A_123	575.77	238.86	661.78	111.61	75.78	844.59	1882.56	234.39	1035.82	194.27	28.55	173.5	23.91	130.09	24.61	60.68	7.58	48.41	6.67	14.9321	0.240804	0.22222	0.00275	332.263	10.9567
A_124	1215.66	324.6	358.32	5.15	0.944	15.87	51.33	8.4	47.55	18.17	6.08	24.49	5.85	48.8	12.62	41.12	7.31	55.83	6.46
A_125	603.97	3321.59	135.99	20.29	6.78	340.37	709.8	89.56	419.03	77.51	20.07	61.97	6.8	31.75	5.41	11.41	1.264	7.58	0.896
A_126	523.79	683.07	812.79	16.83	2.61	522.37	1378.74	203.48	1051.01	242.7	45.42	226.32	30.54	164.04	30.83	71.4	8.09	47.07	5.88	5.57569	0.117203	0.61799	0.0142	335.915	42.312
A_127	348.09	177.97	1932.34	32.76	9.82	1224.82	3045.58	433.46	2138.58	494.96	39.55	491.78	72.09	389.31	73.09	172.14	19.89	110.57	13.3	12.2399	0.220228	0.31356	0.00631	347.052	14.7038
A_129	340.08	547.69	313.54	54.71	22.82	72.29	263.52	47.63	294.42	77.58	15.14	84.4	11.18	62.68	11.92	30.72	3.74	24.61	3.73	12.3183	0.20485	0.37828	0.00539	303.786	12.2254
A_130	409.21	1060.04	746.94	12.61	4.77	812.27	1734.88	227.68	1098.62	230.32	52.66	219.73	29.58	156.73	28.55	64.42	7.28	41.59	5.15	10.5809	0.202639	0.2609	0.00663	439.503	19.0666
A_131	406.34	243.81	309.58	2.61	9.34	53.11	124.96	19.12	118.93	48.92	23.15	77.1	10.48	56.76	11.3	26.39	3.45	23.03	3.41	1.85391	0.0302111	0.32748	0.00403	2302.56	82.4083
A_132	901.39	1816.67	218.63	29.94	8.37	1211.54	2584.64	311.37	1268.2	179.98	36.18	114.98	11.7	51.88	8.14	17.74	2.04	11.75	1.648
A_133	247.74	155.65	134.51	26.54	0.67	83.01	240.52	37.39	185.6	45.72	11.74	42.17	6.05	31.59	5.32	10.55	1.016	5.33	0.53
A_134	371.62	300.98	366.56	38.99	15.73	351.76	1084.86	159.97	795.13	157.66	22.07	136.79	16.47	80.76	14.46	31.78	3.53	18.6	2.6	11.0084	0.182988	0.42274	0.00574	308.319	13.2017
A_135	475.03	477.61	285.89	19.37	22.66	1156.89	1742.97	204.65	964.47	163.08	15.53	122.1	13.08	59.63	10.25	23.43	2.88	16.39	2.2	12.1684	0.201376	0.12507	0.00229	467.528	15.4083
A_136	108.39	260.36	438.39	5.06	1.94	14.82	38.05	5.66	33.14	11.22	3.06	20.29	4.78	46.97	14.38	46.93	5.41	26.75	2.22	6.36983	0.107117	0.49656	0.00688	445.593	22.6012
A_137	1711.06	326.8	734.84	17.01	49.68	365.69	1266.73	194.43	1001.63	222.02	17.08	200.95	27.28	141.04	27.18	64.76	7.77	46.12	6.43	14.243	0.231263	0.27057	0.00359	321.896	11.0681
A_140	1160.75	442.98	340.44	35.33	12.92	1051.74	1853.33	192.03	758.89	117.45	19.79	97.44	11.6	60.52	11.37	30.8	4.1	29.68	5.12	4.94707	0.0827203	0.66388	0.00863	304.043	30.4813
A_141	686.87	344.47	350.62	17.57	15.84	390.88	1025.27	135.41	604.52	113.48	15.48	96.8	11.29	52.47	10.84	26.09	2.79	19.02	3.18	9.43129	0.156551	0.58075	0.00757	226.508	15.3338
A_142	826.18	2332.34	471.84	26.99	5.5	1017.2	2095.49	273.04	1274.91	245.17	46.01	189.69	21.86	101.47	17.2	40.23	4.63	26.59	3.61	8.16393	0.14663	0.4715	0.00829	369.987	20.6844
A_143	229.82	1551.58	73.01	88.26	30.47	977.64	1509.01	133.14	470.43	52.02	13.25	39.54	3.48	15.96	2.71	5.54	0.576	3.24	0.483	8.49979	0.137991	0.57991	0.00691	252.88	15.9003
A_144	1126.56	645.24	233.51	22.25	11.51	912.1	1908.24	217.38	881.91	128.88	21.73	94.58	10.33	48.6	8.48	20.75	2.32	15.45	2.08	8.75887	0.150367	0.54369	0.0081	278.645	17.7845
A_145	237.27	906.12	386.56	24.17	4.71	102.78	285.72	51.62	333.16	108.93	29.22	135.68	19.12	95.82	14.78	26.86	2.09	10.48	1.03	6.59935	0.108008	0.48776	0.00603	440.218	20.411
A_146	1970.18	183.9	2409.48	18.02	55.57	305.39	1027.06	164.46	845.71	285.05	37.07	330.96	65.94	431.76	87.76	236.58	33.15	211.32	26.82	22.3914	0.36099	0.24411	0.00297	214.522	7.18837
A_147	544.92	49.99	1757.44	68.26	10.48	1953.04	4450.6	600.79	2826.75	564.71	32.49	500.09	70.71	379.2	70.66	167.16	19.86	112.65	14.24	13.9218	0.244207	0.46951	0.00781	216.632	11.8429
A_148	590.84	570.85	1071.46	14.27	2.47	599.27	1617	240.57	1260.58	301.75	57.9	294.63	41.76	225.88	41.66	97.56	11.38	64.94	7.99
A_149	43.62	4885.97	1677.61	89.67	0.442	1346.25	3866.85	637.95	3503.85	987.18	168.47	1047.26	144.87	640.96	84.63	121.95	8.73	31.17	2.8
A_151	95.31	618.2	269.81	8.47	3.6	223.9	600.62	87.85	457.53	96.45	25.46	91.14	11.31	57.27	10.84	24.88	2.83	16.38	2.14	8.41397	0.156457	0.61293	0.01117	223.507	23.0463
A_152	1477.22	660.09	1527.64	24.41	5.17	2717.22	6005.9	778.66	3616.85	687.86	52.67	530.84	64.68	314.73	57.73	135.09	16.01	96.04	12.17	12.2011	0.238186	0.26038	0.00697	381.864	17.0831
A_154	561.03	953.53	518.72	37.95	16.8	647.55	1490.34	199.39	945	191.9	27.74	168.59	20.6	107.51	19.02	45.22	5.26	31.22	3.86	12.1655	0.205717	0.41365	0.00611	284.706	12.5182
A_158	285.37	461.1	692.46	10.11	5.73	456.98	1177.09	171.77	889.38	209.24	43.61	211.3	27.16	145.74	27.59	63.77	7.23	41.67	5.74	10.2976	0.197235	0.45591	0.00961	304.328	18.705
A_159	168.13	311	406.31	85.85	119.29	220.17	721.03	115.1	563.53	132.58	32	123.41	17.05	92.2	16.21	35.43	3.8	22.11	2.8	18.4536	0.296265	0.14317	0.00183	302.641	9.70413
A_160	239.2	816.79	84.38	21.31	27.95	76.49	261.29	39.64	191.59	30.96	12.39	23.24	2.46	11.93	2.33	6.21	0.868	6.89	1.339	7.5523	0.123771	0.60151	0.00735	262.378	18.3743
A_161	243.38	578.65	1094.48	180.65	131.15	326.99	1022.13	162.26	870.98	224.62	38.99	224.41	32.46	186.38	38.97	103.74	14.39	96.05	14.78	13.4608	0.213807	0.11223	0.00135	430.599	13.4933
A_162	459.5	228.71	926.39	175.55	11.46	584.76	1652.26	260.22	1327.64	335.8	87.56	311.05	45.58	232.67	38.28	76.13	7.3	35.24	3.94	10.8167	0.18135	0.45803	0.0065	288.009	13.6678
A_163	48.95	929.31	643.02	70.04	1.73	192.39	568.06	90.77	493.98	163.01	55.49	228.77	36.81	186.13	27.5	49.31	4.37	17.8	1.562
A_164	718.31	860.49	295.85	11.51	5.44	668.54	1685.89	230.36	1034.36	183.56	33.23	132.67	15.27	69.72	11.6	25.79	2.91	15.19	1.97	5.13479	0.0901719	0.67756	0.01027	269.693	33.9776
A_165	405.9	470.44	250.5	26.07	4.38	171.99	468.41	69.05	331.42	75.48	19.91	71.79	10.29	55.73	9.6	21.12	2.3	11.71	1.701
A_166	619.7	5061.98	1078.73	210.87	27.08	2565.89	5811.34	783.68	3649.49	685.29	140.38	495.19	58.89	270.37	43.95	84.07	8.53	41.98	4.62	8.03148	0.130945	0.62516	0.00738	222.034	17.1506
A_167	447.65	429.92	950.87	182.04	7.88	367.6	1209.18	197.19	1045.8	275.39	83.41	276.88	39.89	210.58	37.15	82.61	8.86	46.93	5.94	6.35405	0.110625	0.61504	0.00934	296.616	25.9469
A_168	5801.49	725.82	123.09	2.66	0.147	42.84	76.36	8.16	31.93	7.72	2.27	9.11	2.08	15.73	4.05	12.31	2.08	15.17	1.712
A_169	392.26	613.22	489.01	12.21	73.83	61.63	209.99	37.51	233.97	81.27	19.24	91.44	13.36	81.75	17.37	49.2	6.54	44.36	7.04	13.3049	0.214196	0.35544	0.00414	294.704	10.6837
A_170	712.47	484.24	699.75	9.6	4.92	729.22	1602.25	216.84	1045.27	215.69	26.12	191.63	25.19	135.38	26.5	65.54	7.54	45.23	6.31	8.95095	0.173859	0.44295	0.00985	362.134	22.0541
A_171	695.49	534.78	703.34	126.51	20.75	445.39	1370.62	219.42	1240.65	321.36	141.91	303.05	35.4	167	29.22	61.7	6.97	38.06	5.55	15.6519	0.264581	0.36187	0.0056	247.244	10.1009
A_174	367.96	376.15	714.76	58.44	15.4	453.69	1150.97	163.66	831.6	197.3	33.83	197.98	26.88	145.55	27.33	64.73	7.76	42.95	5.66	13.5722	0.23394	0.36611	0.006	282.714	11.9567
A_175	838.4	729.45	303.82	36.88	14.06	1302.51	2614.86	296.18	1181.11	176.71	30.55	133.43	14.98	67.51	11.72	25.94	2.84	16.05	1.98	8.40407	0.141257	0.5176	0.00714	315.623	17.3528
A_176	388.57	167.48	1062.05	9.23	8.13	956.05	2147.96	279.06	1288.57	258.13	9.34	245.45	34.94	194.76	39.31	96.78	11.32	64.57	7.94
A_177	1140.29	406.11	483.73	43.04	1.68	116.26	365.84	57.58	295.97	87.12	23.75	88.25	15.48	94	18.04	46.66	6.19	41.49	5.21	16.6889	0.295231	0.51808	0.00882	156.995	10.3056
A_178	474.7	330.35	87.65	15.95	7.72	365.46	423.41	36.57	138.95	21.25	6.04	20.81	2.52	15.06	3.26	8.57	1.158	8.09	1.403	8.31739	0.145276	0.58	0.00901	258.508	19.7883
A_179	204.2	381.37	229.99	16.33	7.22	257.7	652.3	89.6	437.93	87.36	21.6	79.83		49.96	9.29	21.51	2.22	14.04	1.95	17.0213	0.330285	0.28456	0.00748	263.156	12.2315
A_180	351.39	1137.92	1274.84	46.39	4.33	520.57	1331.43	198.37	1058.56	278.75	60.45	307.7	45.16	253.92	48.31	114.28	12.98	73.93	9.77
A_181	482.91	636.87	990.03	53.52	12.82	940.26	2305.53	310.22	1466.93	303.81	48.94	284.91	38.51	208.86	39.79	91.34	10.87	64.02	8.21	12.5251	0.218059	0.37217	0.0063	302.592	13.1342
A_182	295.09	303.1	460.37	72.06	19.07	936.41	1903.58	214.59	876.17	148.85	27.36	130.99	17.32	91.57	17.73	43.43	5.54	32.73	4.77	12.9116	0.215054	0.38129	0.00545	287.955	11.6864
A_183	717.57	358.09	316.44	3.83	19.7	15.05	47.22	10.51	74.78	33.21	7.29	46.87	7.62	49.28	11.62	34.16	4.77	34.38	5.88	14.6972	0.261371	0.30115	0.00584	295.766	12.1317
A_184	2081.09	345.32	655.33	29.84	13.18	92.79	319.53	53.04	313.94	124.52	38.69	168.87	30.05	167.56	28.37	62.79	7.78	46.36	5.53
A_185	270.25	1352.4	222.98	35.17	14.43	435.84	1117.78	147.23	685.23	117.27	32.74	91.39	10.68	48.21	8.25	18.22	2.07	13.46	1.84	5.24631	0.0864248	0.67367	0.00826	269.805	27.7726
A_186	432.6	537.52	1000.36	21.04	4.58	1195.35	2638.13	363.98	1821.21	391.89	44.41	323.47	40.51	207	38.63	92.25	10.92	67.57	9.04	11.4548	0.233556	0.27511	0.00787	396.683	19.0589
A_187	258.84	1043.32	119.89	32.75	6.07	590.08	912.63	93.92	399.93	66.06	16.47	59.18	6.69	30.21	5	10.77	1.004	5.04	0.795
A_188	345.58	248.66	303.61	29.21	19.41	81.6	246.4	39.33	215.97	63.74	19.31	69.79	10.6	58.87	11.46	27.86	3.3	21.23	2.93	13.6351	0.224959	0.30811	0.00436	314.744	11.4556
A_191	215.46	741.26	125.34	25.29	21.65	205.06	431.62	54.82	257.41	53.65	15.51	45.09	5.68	27.83	4.82	10.55	1.073	6.27	0.836	11.7689	0.196679	0.50551	0.00686	232.226	12.3417
A_192	207.38	359.3	106.67	14.59	10.41	46.01	221.96	41.84	230.47	46.27	12.11	38.41	5.01	24.74	4.32	9.93	1.187	6.95	1.083	12.0163	0.226696	0.45031	0.00924	264.081	15.7245
A_194	621.02	428.77	974.71	6.33	2.5	1014.97	2347.12	308.57	1424.91	288.49	32.96	255.58	35.88	190.4	36.32	89	10.67	61.8	7.44
A_195	198.28	679.14	446.45	112.9	23.6	329.21	906.98	134.72	678.27	168.64	45.33	152	22.1	115.65	18.13	34.8	3.4	15.99	1.462	12.0337	0.199838	0.46505	0.00633	253.944	12.027
A_196	276.62	2965.27	71.31	13.33	9.27	60.08	237.17	42.2	243.93	47.75	13.6	33.94	3.4	15.32	2.81	5.69	0.61	3.9	0.508	2.65534	0.043574	0.76879	0.00903
A_197	628.89	455.58	355.18	25.93	9.44	405.85	1125.09	156.58	761.12	151.85	22.24	121.81	14.97	72.14	12.57	29.82	3.81	24.07	3.54	6.51211	0.108988	0.64312	0.0085	253.505	23.2508
A_198	569.93	303.34	907.88	28.65	26.93	541.7	1436.27	207.28	1058.53	245.56	24.73	233.96	32.1	173.73	34.23	84.24	10.49	62.53	8.64	11.78	0.190111	0.16903	0.00223	454.539	14.6618
A_200	562.37	339.27	191.95	22.06	24.37	145.45	407.68	57.4	272.91	61.66	21.64	55.52	6.57	31.42	6.19	14	1.695	10.82	1.89	11.9048	0.196995	0.49659	0.0064	235.548	11.8181
A_201	163.35	614.93	502.86	119.89	2.75	315.96	939.53	143.71	704.87	182.04	47.16	162.75	24.36	123.24	20.84	40.68	3.78	16.59	1.529
A_202	498.95	3140.17	492.78	24.58	3.87	1660.21	3070.11	363.71	1590.24	283.47	75.81	211.09	23.79	106.74	18.93	41.21	5	25.88	2.71	6.40738	0.115774	0.55158	0.00947	374.509	26.9133
A_203	785.95	243.51	30.96	0.691	0.562	93.31	117.14	10.96	44.99	7.42	2.64	7.92	0.935	5.29	1.076	3.01	0.387	3	0.474
A_204	149.87	2746.65	98.99	0.0001	0.106	1.1	3.81	0.802	6.41	3.37	1.54	8.56	1.708	13.59	3.38	10.61	1.319	7.48	1.278
A_205	230.54	379.82	461.55	33.56	39.35	548.19	1359.01	179.1	823.07	159.32	12.76	136.48	16.96	84.73	15.63	37.06	4.1	22.41	2.97	13.245	0.21578	0.38639	0.00483	277.649	10.7691
A_208	347.32	284.5	1069.81	70.14	52.64	1353.65	3109.09	382.77	1642.25	316.39	21.71	274.01	38.34	202.94	39.56	97.2	11.93	70.23	8.98	20.1654	0.32938	0.16205	0.00247	269.931	8.91778
A_209	504.6	156.31	947.21	31.65	73.43	221.6	754.43	124.53	649.74	222.89	20.91	232.89	41.32	230.79	40.49	89.61	10.51	57.14	6.44	17.5039	0.284941	0.22871	0.00302	280.913	9.44465
A_210	327.79	438.49	616.66	96.86	17.8	499.83	1284.83	178.59	865.43	186.73	32.18	177.93	24.24	130.32	24.46	57.1	6.88	40.08	5.51	13.6593	0.233222	0.37653	0.0059	274.898	11.5998
A_211	532.62	956.84	506.44	32.19	11.36	544.71	1222.68	165.54	799.16	174.36	34.54	153.98	19.81	103.43	18.7	43.04	5.01	28.75	3.76	11.4194	0.192997	0.43082	0.00637	291.546	13.2793
A_212	1048.65	251.01	1443.02	57.3	17.07	677.93	2115.45	321.09	1513.83	355.31	30.7	300.8	44.87	252.98	47.97	127.66	18.26	128.24	18.98	8.17795	0.135764	0.62281	0.00807	220.271	18.045
A_213	203.33	6262.57	233.21	14.36	0.61	42.7	133.18	22.23	129.66	42.2	11.67	49.03	7.35	41.63	8.52	21.27	2.65	17.09	2.59
A_214	51.35	1510.01	26.99	0.073	0.067	2.55	9.28	2.025	17.29	6.36	2.29	8.53	0.85	3.56	0.862	2.02	0.229	1.17	0.189
A_215	427.41	772.82	459	327.37	139.57	1216.08	3465.22	462.54	2007.11	303.11	56.12	173.57	19.46	88.04	15.39	38.75	5.39	36.55	5.37	16.116	0.259727	0.18675	0.00229	325.108	10.5648
A_216	316.15	561.59	202	40.11	45.19	646.48	1251.28	142.73	618.97	97.65	16.01	73.71	8.25	38.8	7.08	16.76	2.16	13.01	2.05	15.083	0.24797	0.3681	0.00493	253.317	9.8294
A_217	255.57	197.77	201.39	19.81	6.75	46.37	156.24	26.64	159.63	53.02	14.17	57.07	7.86	43.11	7.94	17.36	2.22	12.44	1.809	4.68779	0.0857041	0.57157	0.00986	484.513	36.9654
A_218	403.19	498.69	192.91	143.72	148.11	626.09	1463.08	162.04	652.44	89.27	22.54	67.44	6.47	29.91	6	14.72	2.01	15.02	2.84	19.9521	0.31847	0.27975	0.00323	226.535	7.64587
A_219	403.84	807.5	628.14	9.29	2.25	542.98	1230.1	168.15	844.73	192.71	48.86	185.21	25.72	132.39	23.9	53.77	6.24	34.86	4.6	9.81932	0.21405	0.28297	0.0092	456.201	24.0985
A_220	335.95	356.27	837.66	37.92	28.57	358.09	1141.09	177.9	933.25	225.67	30.98	218.71	31.99	171.41	33	78.29	9.62	55.25	7.44	15.625	0.26123	0.26436	0.00412	296.67	10.6507
A_221	1340.74	86.94	413.25	4.38	19.38	98.5	303.02	48.31	262	73.97	12.99	89.43	11.93	63.67	14.3	38.48	5.25	36.89	7.17	11.9574	0.200172	0.42197	0.006	284.189	12.4496
A_222	3937.4	464.64	600.49	28.68	3.81	362.5	979.27	149.52	792.05	194.47	37.04	197.43	26.02	135.49	23.19	50.99	5.84	31.79	4.01
A_225	305.09	275.3	710.91	88.86	4.49	412.4	1215.87	190.04	960.42	245.14	65.87	228.16	33.55	174.73	28.54	58.16	5.66	28.02	3.2
A_227	383.24	959.03	336.79	94.6	55.65	850.82	1742.14	207.53	914.02	161.23	35.17	129.34	16.01	77.74	13.48	28.45	3.08	17.94	2.51	12.8172	0.21028	0.41982	0.00533	266.336	11.0369
A_228	478.55	285.95	314.1	48.45	11.56	749.93	1220.29	124.84	526.45	96.59	24.62	89.63	11.55	63.6	11.34	26.94	3.39	19.93	3.17	15.0195	0.268448	0.29192	0.00583	294.246	12.0516
A_230																				4.78515	0.077394	0.55214	0.00635	506.752	26.7424
A_231	471.83	937.72	883.13	19.78	5.15	617.26	1468.07	207.72	1061.09	249.09	44.7	234.73	32.25	170.99	32.56	75.94	8.95	51	6.72	6.13497	0.109526	0.64123	0.01037	272.489	29.0539
A_232	316.9	998.33	481.41	122.71	10.26	816.28	1601.01	199.1	912.19	186.38	48.33	163.26	23.43	118.03	19.89	39.16	3.79	16.89	1.902	7.82044	0.133327	0.59088	0.00848	264.153	19.8988
A_233	599.21	878.38	664.23	67.24	6.03	523.54	1366.99	203.13	1054.28	251.83	59.3	232.46	30.3	154.21	26.02	56.46	6.03	32.98	4.35	7.13063	0.128132	0.54691	0.00933	340.581	24.0786
A_234	431.09	1802	172.29	39.49	10.23	387.64	960.96	125.68	563.09	94.65	20.72	72.62	8.39	42.19	6.68	13.49	1.265	5.63	0.879	7.75735	0.130583	0.61562	0.00836	240.296	19.5904
A_235	346.91	645.39	1090.77	56.29	8.5	771.57	1938.9	277.76	1382.76	312.72	57.3	296.96	40.53	223.04	40.54	93.36	10.68	60.1	7.41	4.78492	0.0805919	0.57389	0.00781	470.231	30.2322
A_236	1384.66	191.87	1417.7	0.16	4.72	130.93	611.5	123.53	760.41	314.96	19.8	334.82	54.28	301.84	53.15	124.54	14.8	85.49	10.51	20.9161	0.345613	0.38619	0.00534	175.704	7.15704
